# Supplementary material for: Pathogenic Variants in USH1G/SANS Alter Protein Interaction with Pre-RNA Processing Factors PRPF6 and PRPF31 of the Spliceosome
Source: Int J Mol Sci. 2023 Dec 18;24(24):17608. doi: 10.3390/ijms242417608 (PMC10744108; doi:10.3390/ijms242417608)
Supplement: Supplementary file 1 [file ijms-24-17608-s001.zip]

Archive with 4 entries (4 files):
- MDPI_IJMS_Supplementary_Material_Fritze_et_al.pdf
- Table S1.xlsx
- Table S2.xlsx
- Table S3.xlsx
