# Supplementary material for: Pathogenic Variants in USH1G/SANS Alter Protein Interaction with Pre-RNA Processing Factors PRPF6 and PRPF31 of the Spliceosome
Source: Int J Mol Sci. 2023 Dec 18;24(24):17608. doi: 10.3390/ijms242417608 (PMC10744108; doi:10.3390/ijms242417608)
Supplement: Supplementary file 1 [file ijms-24-17608-s001.zip › Table S1.xlsx]

## Sheet: DNA_constructs
DNA construct name	Reference
eYFP-SANS	This work
eCFP-c-eYFP	This work
pDest-501/eCFP control	Kindly provided by Ronald Roepman
pDest-734/eYFP control	Kindly provided by Ronald Roepman
pDest-733/mRFP control	Kindly provided by Ronald Roepman
pDest-mCherry-N1	Robin Shaw (Addgene 31907)
harmonin-eCFP	This work
PRPF6-eCFP	This work
eCFP-PRPF31	This work
eYFP-SANS-S278Pfs*71	This work
eYFP-SANS-V132Gfs*3	This work
eYFP-SANS-Nterm	This work
mRFP-PRPF31	This work
eCFP-PRPF3	This work
PRPF6-mCherry	This work
PRPF6-eYFP	This work

## Sheet: Primer
Primer name	Sequence 5'-3'
harmonin_fwd	CACCATGGACCGAAAAGTG
harmonin_rev	GAAGAAGGTCAGCTCATCG
PRPF6_fwd	CACCATGAACAAGAAGAAG
PRPF6_rev	GAAGGTGTTCTTGATGC
PRPF31_fwd	CACCTCTCTGGCAGATG
PRPF31_rev	TCAGGTGGACATAAGGCCACTC
SANS_fwd	CACCATGAACGACCAGTAC
SANS_rev	TAGCTCTGTGTCCTCCAG
PRPF3_fwd	CACCGCACTGTCAAAGAGG
PRPF3_rev	TCAATCAGTGGACTCTAACAC
