# Supplementary material for: Pathogenic Variants in USH1G/SANS Alter Protein Interaction with Pre-RNA Processing Factors PRPF6 and PRPF31 of the Spliceosome
Source: Int J Mol Sci. 2023 Dec 18;24(24):17608. doi: 10.3390/ijms242417608 (PMC10744108; doi:10.3390/ijms242417608)
Supplement: Supplementary file 1 [file ijms-24-17608-s001.zip › Table S2.xlsx]

## Sheet: Description
The following is a description of this table: contacts were predicted by chimera as described online: https://www.cgl.ucsf.edu/chimera/docs/ContributedSoftware/findclash/findclash.html contacts were predicted between the two proteins of interest with a threshold of -0.4 output includes the following: protein residue no.: residue number of whole protein atom1: atom of protein1, which builds contac…

## Sheet: PRPF31-NOP_SANS-CENTn1
	Allowed	overlap:	-0.4
	H-bond	overlap	reduction:	0
	Ignore	contacts	between	atoms	separated	by	4	bonds	or	less
	Detect	intra-residue	contacts:	False
	Detect	intra-molecule	contacts:	False
	84	contacts
PRPF31				SANS
protein residue no.	atom1			protein residue no.	atom2			overlap	distance [Å]
310	GLU	96.B	OE1	143	ALA	16.C	CB	1.843	1.457
310	GLU	96.B	CD	143	ALA	16.C	CB	1.608	2.152
293	ARG	79.B	NH1	165	TYR	38.C	CB	1.432	2.088
246	ALA	32.B	CB	154	GLN	27.C	NE2	1.326	2.194
293	ARG	79.B	NH2	165	TYR	38.C	CG	1.101	2.149
293	ARG	79.B	NH2	165	TYR	38.C	CD1	1.05	2.35
293	ARG	79.B	NH2	165	TYR	38.C	CD2	0.91	2.49
310	GLU	96.B	OE2	147	ILE	20.C	CD1	0.887	2.413
310	GLU	96.B	OE1	143	ALA	16.C	CA	0.871	2.429
304	ARG	90.B	NH1	150	CYS	23.C	CB	0.733	2.787
297	ALA	83.B	CA	154	GLN	27.C	NE2	0.686	2.834
301	LEU	87.B	CD2	151	ALA	24.C	CA	0.669	3.091
310	GLU	96.B	CG	143	ALA	16.C	CB	0.649	3.111
293	ARG	79.B	CZ	165	TYR	38.C	CB	0.634	2.856
293	ARG	79.B	NH2	165	TYR	38.C	CB	0.628	2.892
310	GLU	96.B	CD	143	ALA	16.C	CA	0.596	3.164
293	ARG	79.B	NH2	165	TYR	38.C	CE1	0.554	2.846
304	ARG	90.B	CD	150	CYS	23.C	SG	0.52	3.13
293	ARG	79.B	NH1	165	TYR	38.C	CG	0.519	2.731
310	GLU	96.B	OE1	143	ALA	16.C	C	0.46	2.57
310	GLU	96.B	OE2	143	ALA	16.C	CB	0.446	2.854
293	ARG	79.B	NH2	165	TYR	38.C	CE2	0.437	2.963
293	ARG	79.B	CZ	165	TYR	38.C	CG	0.436	2.784
297	ALA	83.B	CB	154	GLN	27.C	NE2	0.383	3.137
304	ARG	90.B	NH1	150	CYS	23.C	CA	0.375	3.145
304	ARG	90.B	CD	150	CYS	23.C	CB	0.365	3.395
304	ARG	90.B	NH1	150	CYS	23.C	SG	0.361	3.049
310	GLU	96.B	CD	143	ALA	16.C	C	0.355	3.135
310	GLU	96.B	OE1	144	GLU	17.C	N	0.324	2.736
305	VAL	91.B	CG2	147	ILE	20.C	CD1	0.284	3.476
305	VAL	91.B	CG2	147	ILE	20.C	CG2	0.28	3.48
247	CYS	33.B	CB	157	HIS	30.C	NE2	0.239	3.281
310	GLU	96.B	CD	147	ILE	20.C	CD1	0.223	3.537
293	ARG	79.B	CZ	165	TYR	38.C	CD2	0.212	3.158
310	GLU	96.B	OE2	147	ILE	20.C	CG1	0.2	3.1
246	ALA	32.B	CB	154	GLN	27.C	CD	0.19	3.3
293	ARG	79.B	NH1	161	MET	34.C	O	0.175	2.885
293	ARG	79.B	NH2	165	TYR	38.C	CZ	0.138	3.112
301	LEU	87.B	CD2	151	ALA	24.C	N	0.129	3.391
301	LEU	87.B	CD2	151	ALA	24.C	CB	0.084	3.676
293	ARG	79.B	NH1	165	TYR	38.C	CA	0.075	3.445
247	CYS	33.B	SG	157	HIS	30.C	NE2	0.06	3.35
310	GLU	96.B	OE2	143	ALA	16.C	C	0.051	2.979
246	ALA	32.B	CA	154	GLN	27.C	NE2	0.041	3.479
304	ARG	90.B	NH1	150	CYS	23.C	O	0.028	3.032
293	ARG	79.B	CZ	165	TYR	38.C	CD1	0.027	3.343
293	ARG	79.B	NH1	165	TYR	38.C	CD2	0.013	3.387
297	ALA	83.B	CB	154	GLN	27.C	CG	0.002	3.758
310	GLU	96.B	CD	144	GLU	17.C	N	-0.003	3.523
305	VAL	91.B	CG2	147	ILE	20.C	CG1	-0.02	3.78
310	GLU	96.B	OE2	143	ALA	16.C	O	-0.047	2.887
310	GLU	96.B	CB	147	ILE	20.C	CD1	-0.062	3.822
297	ALA	83.B	O	154	GLN	27.C	CG	-0.07	3.37
293	ARG	79.B	NH1	162	GLU	35.C	CA	-0.074	3.594
247	CYS	33.B	SG	157	HIS	30.C	CE1	-0.08	3.61
305	VAL	91.B	CG1	147	ILE	20.C	CD1	-0.084	3.844
310	GLU	96.B	OE2	143	ALA	16.C	CA	-0.095	3.395
301	LEU	87.B	CD2	150	CYS	23.C	C	-0.097	3.587
304	ARG	90.B	NH1	150	CYS	23.C	C	-0.104	3.354
297	ALA	83.B	CA	154	GLN	27.C	CG	-0.113	3.873
293	ARG	79.B	NH1	165	TYR	38.C	CD1	-0.122	3.522
301	LEU	87.B	CD2	154	GLN	27.C	CB	-0.125	3.885
305	VAL	91.B	CA	147	ILE	20.C	CD1	-0.163	3.923
305	VAL	91.B	CB	147	ILE	20.C	CD1	-0.172	3.932
310	GLU	96.B	CD	143	ALA	16.C	O	-0.205	3.505
247	CYS	33.B	N	157	HIS	30.C	NE2	-0.21	3.49
294	LEU	80.B	CA	158	HIS	31.C	CE1	-0.21	3.85
310	GLU	96.B	OE1	140	PHE	13.C	O	-0.25	3.09
297	ALA	83.B	CA	154	GLN	27.C	CD	-0.258	3.748
310	GLU	96.B	OE1	143	ALA	16.C	N	-0.263	3.323
308	PHE	94.B	CE1	146	ARG	19.C	CD	-0.273	3.913
301	LEU	87.B	CD1	151	ALA	24.C	CB	-0.279	4.039
304	ARG	90.B	NE	150	CYS	23.C	SG	-0.28	3.69
246	ALA	32.B	CB	157	HIS	30.C	CD2	-0.287	3.927
304	ARG	90.B	CZ	150	CYS	23.C	SG	-0.293	3.673
247	CYS	33.B	CB	157	HIS	30.C	CE1	-0.314	3.954
301	LEU	87.B	CD2	150	CYS	23.C	O	-0.318	3.618
301	LEU	87.B	CD1	151	ALA	24.C	CA	-0.319	4.079
304	ARG	90.B	CZ	150	CYS	23.C	CB	-0.331	3.821
246	ALA	32.B	CB	154	GLN	27.C	OE1	-0.343	3.643
293	ARG	79.B	NH1	161	MET	34.C	C	-0.347	3.597
247	CYS	33.B	CB	161	MET	34.C	CE	-0.351	4.111
308	PHE	94.B	CE1	146	ARG	19.C	NH1	-0.361	3.761
308	PHE	94.B	CZ	146	ARG	19.C	CD	-0.395	4.035

## Sheet: PRPF6-C-term_SANS-CENTn
	Allowed	overlap:	-0.4
	H-bond	overlap	reduction:		0
	Ignore	contacts	between		atoms	separated	by	4	bonds	or	less
	Detect	intra-residue	contacts:		False
	Detect	intra-molecule	contacts:		False
	122	contacts
PRPF6				SANS
protein residue no.	atom1			protein residue no.	atom2			overlap	distance [Å]
609	VAL	17.B	CG2	173	SER	46.C	OG	2.397	0.943
609	VAL	17.B	CB	173	SER	46.C	OG	2.217	1.123
593	LEU	1.B	CD2	190	LEU	63.C	CD1	2.016	1.744
609	VAL	17.B	CG2	173	SER	46.C	CB	1.753	2.007
609	VAL	17.B	CG1	173	SER	46.C	OG	1.335	2.005
609	VAL	17.B	CB	173	SER	46.C	CB	1.32	2.44
907	ARG	315.B	NH2	180	SER	53.C	CA	1.227	2.293
907	ARG	315.B	NH2	179	SER	52.C	O	1.127	1.933
609	VAL	17.B	CG2	173	SER	46.C	CA	1.103	2.657
604	CYS	12.B	SG	166	ARG	39.C	CG	0.971	2.679
593	LEU	1.B	CD2	190	LEU	63.C	CG	0.924	2.836
907	ARG	315.B	NH1	180	SER	53.C	CA	0.911	2.609
650	LYS	58.B	NZ	179	SER	52.C	CB	0.875	2.645
609	VAL	17.B	CG2	173	SER	46.C	C	0.863	2.627
609	VAL	17.B	CG2	173	SER	46.C	O	0.813	2.487
905	GLU	313.B	OE2	182	THR	55.C	CG2	0.81	2.49
609	VAL	17.B	CA	173	SER	46.C	OG	0.788	2.552
650	LYS	58.B	NZ	179	SER	52.C	CA	0.763	2.757
609	VAL	17.B	CG1	173	SER	46.C	CB	0.746	3.014
907	ARG	315.B	CZ	180	SER	53.C	CA	0.692	2.798
650	LYS	58.B	NZ	179	SER	52.C	OG	0.675	2.425
604	CYS	12.B	SG	166	ARG	39.C	CD	0.654	2.996
593	LEU	1.B	CG	190	LEU	63.C	CD1	0.612	3.148
907	ARG	315.B	NH2	179	SER	52.C	C	0.594	2.656
907	ARG	315.B	NH2	180	SER	53.C	C	0.581	2.669
905	GLU	313.B	OE2	182	THR	55.C	CB	0.554	2.746
593	LEU	1.B	CD2	190	LEU	63.C	CB	0.497	3.263
907	ARG	315.B	NH1	180	SER	53.C	CB	0.43	3.09
593	LEU	1.B	CD2	190	LEU	63.C	CD2	0.426	3.334
610	LEU	18.B	CD2	169	LEU	42.C	CD2	0.397	3.363
907	ARG	315.B	NH2	180	SER	53.C	N	0.395	2.885
616	LYS	24.B	CG	186	LEU	59.C	CD1	0.391	3.369
907	ARG	315.B	CZ	179	SER	52.C	O	0.299	2.731
604	CYS	12.B	SG	166	ARG	39.C	NE	0.279	3.131
907	ARG	315.B	NH1	180	SER	53.C	N	0.265	3.015
597	LEU	5.B	CG	190	LEU	63.C	CD2	0.254	3.506
609	VAL	17.B	CB	173	SER	46.C	CA	0.253	3.507
616	LYS	24.B	CE	181	LEU	54.C	O	0.252	3.048
613	MET	21.B	CE	189	ARG	62.C	CB	0.241	3.519
905	GLU	313.B	CB	182	THR	55.C	CG2	0.184	3.576
597	LEU	5.B	CD1	190	LEU	63.C	CD2	0.166	3.594
619	TRP	27.B	CZ3	178	PHE	51.C	CE1	0.162	3.358
905	GLU	313.B	CD	182	THR	55.C	CG2	0.16	3.6
619	TRP	27.B	CE3	178	PHE	51.C	CE1	0.154	3.366
613	MET	21.B	CG	186	LEU	59.C	CD2	0.151	3.609
905	GLU	313.B	OE2	182	THR	55.C	CA	0.151	3.149
907	ARG	315.B	NH2	180	SER	53.C	O	0.134	2.926
613	MET	21.B	CB	186	LEU	59.C	CD2	0.125	3.635
620	LEU	28.B	CD1	186	LEU	59.C	CD1	0.096	3.664
596	LEU	4.B	CD2	193	LEU	66.C	CB	0.09	3.67
905	GLU	313.B	CD	182	THR	55.C	CB	0.082	3.678
609	VAL	17.B	CG1	173	SER	46.C	CA	0.081	3.679
907	ARG	315.B	NH1	179	SER	52.C	C	0.077	3.173
613	MET	21.B	CA	186	LEU	59.C	CD2	0.071	3.689
907	ARG	315.B	NH2	182	THR	55.C	CG2	0.053	3.467
610	LEU	18.B	CD2	193	LEU	66.C	CD1	0.037	3.723
613	MET	21.B	CE	190	LEU	63.C	CD2	0.033	3.727
613	MET	21.B	CE	190	LEU	63.C	CG	0.025	3.735
616	LYS	24.B	CB	178	PHE	51.C	CE2	0.02	3.62
609	VAL	17.B	CG1	189	ARG	62.C	NH1	0.012	3.508
610	LEU	18.B	CG	169	LEU	42.C	CD2	0.01	3.75
597	LEU	5.B	CD2	190	LEU	63.C	CD2	0.002	3.758
647	ALA	55.B	CB	178	PHE	51.C	CB	0.001	3.759
596	LEU	4.B	CD2	194	ALA	67.C	CA	-0.005	3.765
612	LEU	20.B	CB	181	LEU	54.C	CD1	-0.008	3.768
616	LYS	24.B	CB	186	LEU	59.C	CD1	-0.012	3.772
907	ARG	315.B	CZ	179	SER	52.C	C	-0.018	3.238
650	LYS	58.B	CE	179	SER	52.C	OG	-0.018	3.358
610	LEU	18.B	CD1	169	LEU	42.C	CD2	-0.036	3.796
650	LYS	58.B	CD	179	SER	52.C	OG	-0.049	3.389
907	ARG	315.B	NH2	180	SER	53.C	CB	-0.059	3.579
647	ALA	55.B	CB	178	PHE	51.C	CG	-0.071	3.561
609	VAL	17.B	N	173	SER	46.C	OG	-0.072	3.172
593	LEU	1.B	CG	190	LEU	63.C	CB	-0.073	3.833
596	LEU	4.B	CD2	194	ALA	67.C	N	-0.078	3.598
613	MET	21.B	CG	181	LEU	54.C	CD2	-0.081	3.841
616	LYS	24.B	CG	181	LEU	54.C	O	-0.082	3.382
593	LEU	1.B	CG	190	LEU	63.C	CG	-0.098	3.858
907	ARG	315.B	NH1	179	SER	52.C	O	-0.106	3.166
609	VAL	17.B	CG2	174	ASP	47.C	N	-0.113	3.633
616	LYS	24.B	CA	178	PHE	51.C	CE2	-0.121	3.761
609	VAL	17.B	CA	173	SER	46.C	CB	-0.121	3.881
907	ARG	315.B	CZ	180	SER	53.C	N	-0.127	3.377
613	MET	21.B	CE	193	LEU	66.C	CD1	-0.131	3.891
650	LYS	58.B	CD	178	PHE	51.C	CD1	-0.135	3.775
616	LYS	24.B	N	178	PHE	51.C	CE2	-0.146	3.546
616	LYS	24.B	CD	178	PHE	51.C	CZ	-0.149	3.789
612	LEU	20.B	O	178	PHE	51.C	CE2	-0.158	3.338
596	LEU	4.B	CD2	193	LEU	66.C	C	-0.163	3.653
619	TRP	27.B	CE3	178	PHE	51.C	CZ	-0.164	3.684
647	ALA	55.B	CB	178	PHE	51.C	CD2	-0.166	3.806
613	MET	21.B	CA	181	LEU	54.C	CD1	-0.168	3.928
616	LYS	24.B	CA	178	PHE	51.C	CZ	-0.174	3.814
604	CYS	12.B	CB	166	ARG	39.C	CG	-0.191	3.951
907	ARG	315.B	CZ	180	SER	53.C	CB	-0.202	3.692
593	LEU	1.B	CD1	190	LEU	63.C	CD1	-0.205	3.965
612	LEU	20.B	CD2	178	PHE	51.C	CD2	-0.206	3.846
620	LEU	28.B	CD1	183	SER	56.C	CA	-0.217	3.977
907	ARG	315.B	NH2	181	LEU	54.C	N	-0.227	3.507
612	LEU	20.B	C	181	LEU	54.C	CD1	-0.228	3.718
650	LYS	58.B	CE	179	SER	52.C	CB	-0.229	3.989
616	LYS	24.B	CG	181	LEU	54.C	CB	-0.23	3.99
613	MET	21.B	N	181	LEU	54.C	CD1	-0.261	3.781
613	MET	21.B	CG	181	LEU	54.C	CD1	-0.264	4.024
650	LYS	58.B	NZ	179	SER	52.C	N	-0.278	3.558
596	LEU	4.B	CD1	194	ALA	67.C	CA	-0.286	4.046
647	ALA	55.B	CB	178	PHE	51.C	CD1	-0.298	3.938
643	GLU	51.B	OE2	177	SER	50.C	CA	-0.31	3.61
593	LEU	1.B	CG	190	LEU	63.C	CD2	-0.317	4.077
905	GLU	313.B	CG	182	THR	55.C	CG2	-0.335	4.095
616	LYS	24.B	CB	178	PHE	51.C	CZ	-0.343	3.983
905	GLU	313.B	CD	182	THR	55.C	CA	-0.364	4.124
647	ALA	55.B	CA	178	PHE	51.C	CB	-0.364	4.124
615	ALA	23.B	CB	178	PHE	51.C	CE2	-0.365	4.005
604	CYS	12.B	SG	166	ARG	39.C	CB	-0.367	4.017
647	ALA	55.B	CA	178	PHE	51.C	CD1	-0.37	4.01
616	LYS	24.B	CD	181	LEU	54.C	O	-0.376	3.676
612	LEU	20.B	CB	178	PHE	51.C	CD2	-0.384	4.024
650	LYS	58.B	CE	179	SER	52.C	CA	-0.384	4.144
613	MET	21.B	CE	186	LEU	59.C	CD2	-0.395	4.155
604	CYS	12.B	CB	166	ARG	39.C	CD	-0.397	4.157
610	LEU	18.B	CD2	193	LEU	66.C	CD2	-0.398	4.158
