# Supplementary material for: Pathogenic Variants in USH1G/SANS Alter Protein Interaction with Pre-RNA Processing Factors PRPF6 and PRPF31 of the Spliceosome
Source: Int J Mol Sci. 2023 Dec 18;24(24):17608. doi: 10.3390/ijms242417608 (PMC10744108; doi:10.3390/ijms242417608)
Supplement: Supplementary file 1 [file ijms-24-17608-s001.zip › Table S3.xlsx]

## Sheet: vertebrata
>XP_012893246.1	Dipodomys	ordii		Eukaryota	Metazoa	Chordata	Craniata	Vertebrata	Euteleostomi	Mammalia	Eutheria	Euarchontoglires	Glires	Rodentia	Castorimorpha	Heteromyidae	Dipodomyinae	Dipodomys
>XP_003495716.1	Cricetulus	griseus		Eukaryota	Metazoa	Chordata	Craniata	Vertebrata	Euteleostomi	Mammalia	Eutheria	Euarchontoglires	Glires	Rodentia	Myomorpha	Muroidea	Cricetidae	Cricetinae	Cricetulus
>XP_051013837.1	Acomys	russatus		Eukaryota	Metazoa	Chordata	Craniata	Vertebrata	Euteleostomi	Mammalia	Eutheria	Euarchontoglires	Glires	Rodentia	Myomorpha	Muroidea	Muridae	Deomyinae	Acomys
>XP_004630138.1	Octodon	degus		Eukaryota	Metazoa	Chordata	Craniata	Vertebrata	Euteleostomi	Mammalia	Eutheria	Euarchontoglires	Glires	Rodentia	Hystricomorpha	Octodontidae	Octodon
>XP_005412318.1	Chinchilla	lanigera		Eukaryota	Metazoa	Chordata	Craniata	Vertebrata	Euteleostomi	Mammalia	Eutheria	Euarchontoglires	Glires	Rodentia	Hystricomorpha	Chinchillidae	Chinchilla
>XP_008071527.1	Carlito	syrichta		Eukaryota	Metazoa	Chordata	Craniata	Vertebrata	Euteleostomi	Mammalia	Eutheria	Euarchontoglires	Primates	Haplorrhini	Tarsiiformes	Tarsiidae	Carlito
>XP_012658451.1	Otolemur	garnettii		Eukaryota	Metazoa	Chordata	Craniata	Vertebrata	Euteleostomi	Mammalia	Eutheria	Euarchontoglires	Primates	Strepsirrhini	Lorisiformes	Galagidae	Otolemur
>XP_015359786.1	Marmota	marmota	marmota	Eukaryota	Metazoa	Chordata	Craniata	Vertebrata	Euteleostomi	Mammalia	Eutheria	Euarchontoglires	Glires	Rodentia	Sciuromorpha	Sciuridae	Xerinae	Marmotini		Marmota
>XP_026260660.1	Urocitellus	parryii		Eukaryota	Metazoa	Chordata	Craniata	Vertebrata	Euteleostomi	Mammalia	Eutheria	Euarchontoglires	Glires	Rodentia	Sciuromorpha	Sciuridae	Xerinae	Marmotini	Urocitellus
>XP_012634205.1	Microcebus	murinus		Eukaryota	Metazoa	Chordata	Craniata	Vertebrata	Euteleostomi	Mammalia	Eutheria	Euarchontoglires	Primates	Strepsirrhini	Lemuriformes	Cheirogaleidae	Microcebus
>XP_012517715.1	Propithecus	coquereli		Eukaryota	Metazoa	Chordata	Craniata	Vertebrata	Euteleostomi	Mammalia	Eutheria	Euarchontoglires	Primates	Strepsirrhini	Lemuriformes	Indriidae	Propithecus
>XP_045425821.1	Lemur	catta		Eukaryota	Metazoa	Chordata	Craniata	Vertebrata	Euteleostomi	Mammalia	Eutheria	Euarchontoglires	Primates	Strepsirrhini	Lemuriformes	Lemuridae	Lemur
>XP_017391180.1	Cebus	imitator		Eukaryota	Metazoa	Chordata	Craniata	Vertebrata	Euteleostomi	Mammalia	Eutheria	Euarchontoglires	Primates	Haplorrhini	Platyrrhini	Cebidae	Cebinae	Cebus
>XP_003931803.1	Saimiri	boliviensis	boliviensis	Eukaryota	Metazoa	Chordata	Craniata	Vertebrata	Euteleostomi	Mammalia	Eutheria	Euarchontoglires	Primates	Haplorrhini	Platyrrhini	Cebidae	Saimiriinae	Saimiri
>XP_012309379.1	Aotus	nancymaae		Eukaryota	Metazoa	Chordata	Craniata	Vertebrata	Euteleostomi	Mammalia	Eutheria	Euarchontoglires	Primates	Haplorrhini	Platyrrhini	Aotidae	Aotus
>XP_008009999.1	Chlorocebus	sabaeus		Eukaryota	Metazoa	Chordata	Craniata	Vertebrata	Euteleostomi	Mammalia	Eutheria	Euarchontoglires	Primates	Haplorrhini	Catarrhini	Cercopithecidae	Cercopithecinae	Chlorocebus
>XP_011897961.1	Cercocebus	atys		Eukaryota	Metazoa	Chordata	Craniata	Vertebrata	Euteleostomi	Mammalia	Eutheria	Euarchontoglires	Primates	Haplorrhini	Catarrhini	Cercopithecidae	Cercopithecinae	Cercocebus
>XP_004040997.2	Gorilla	gorilla	gorilla	Eukaryota	Metazoa	Chordata	Craniata	Vertebrata	Euteleostomi	Mammalia	Eutheria	Euarchontoglires	Primates	Haplorrhini	Catarrhini	Hominidae	Gorilla
>NP_775748.2	Homo	sapiens		Eukaryota	Metazoa	Chordata	Craniata	Vertebrata	Euteleostomi	Mammalia	Eutheria	Euarchontoglires	Primates	Haplorrhini	Catarrhini	Hominidae	Homo
>XP_008964141.2	Pan	paniscus		Eukaryota	Metazoa	Chordata	Craniata	Vertebrata	Euteleostomi	Mammalia	Eutheria	Euarchontoglires	Primates	Haplorrhini	Catarrhini	Hominidae	Pan
>XP_024091013.1	Pongo	abelii		Eukaryota	Metazoa	Chordata	Craniata	Vertebrata	Euteleostomi	Mammalia	Eutheria	Euarchontoglires	Primates	Haplorrhini	Catarrhini	Hominidae	Pongo
>XP_003279093.2	Nomascus	leucogenys		Eukaryota	Metazoa	Chordata	Craniata	Vertebrata	Euteleostomi	Mammalia	Eutheria	Euarchontoglires	Primates	Haplorrhini	Catarrhini	Hylobatidae	Nomascus
>NP_789817.1	Mus	musculus		Eukaryota	Metazoa	Chordata	Craniata	Vertebrata	Euteleostomi	Mammalia	Eutheria	Euarchontoglires	Glires	Rodentia	Myomorpha	Muroidea	Muridae	Murinae	Mus	Mus
>XP_028608751.1	Grammomys	surdaster		Eukaryota	Metazoa	Chordata	Craniata	Vertebrata	Euteleostomi	Mammalia	Eutheria	Euarchontoglires	Glires	Rodentia	Myomorpha	Muroidea	Muridae	Murinae	Grammomys
>XP_052053459.1	Apodemus	sylvaticus		Eukaryota	Metazoa	Chordata	Craniata	Vertebrata	Euteleostomi	Mammalia	Eutheria	Euarchontoglires	Glires	Rodentia	Myomorpha	Muroidea	Muridae	Murinae	Apodemus	Sylvaemus	group
>XP_006145903.1	Tupaia	chinensis		Eukaryota	Metazoa	Chordata	Craniata	Vertebrata	Euteleostomi	Mammalia	Eutheria	Euarchontoglires	Scandentia	Tupaiidae	Tupaia
>XP_003464875.1	Cavia	porcellus		Eukaryota	Metazoa	Chordata	Craniata	Vertebrata	Euteleostomi	Mammalia	Eutheria	Euarchontoglires	Glires	Rodentia	Hystricomorpha	Caviidae	Cavia
>XP_036125118.1	Molossus	molossus		Eukaryota	Metazoa	Chordata	Craniata	Vertebrata	Euteleostomi	Mammalia	Eutheria	Laurasiatheria	Chiroptera	Microchiroptera	Molossidae	Molossus
>XP_006912304.1	Pteropus	alecto		Eukaryota	Metazoa	Chordata	Craniata	Vertebrata	Euteleostomi	Mammalia	Eutheria	Laurasiatheria	Chiroptera	Megachiroptera	Pteropodidae	Pteropodinae	Pteropus
>XP_015988001.2	Rousettus	aegyptiacus		Eukaryota	Metazoa	Chordata	Craniata	Vertebrata	Euteleostomi	Mammalia	Eutheria	Laurasiatheria	Chiroptera	Megachiroptera	Pteropodidae	Pteropodinae	Rousettus
>XP_004432789.1	Ceratotherium	simum	simum	Eukaryota	Metazoa	Chordata	Craniata	Vertebrata	Euteleostomi	Mammalia	Eutheria	Laurasiatheria	Perissodactyla	Rhinocerotidae	Ceratotherium
>XP_028376957.1	Phyllostomus	discolor		Eukaryota	Metazoa	Chordata	Craniata	Vertebrata	Euteleostomi	Mammalia	Eutheria	Laurasiatheria	Chiroptera	Microchiroptera	Phyllostomidae	Phyllostominae	Phyllostomus
>XP_029783928.1	Suricata	suricatta		Eukaryota	Metazoa	Chordata	Craniata	Vertebrata	Euteleostomi	Mammalia	Eutheria	Laurasiatheria	Carnivora	Feliformia	Herpestidae	Suricata
>XP_045346795.1	Leopardus	geoffroyi		Eukaryota	Metazoa	Chordata	Craniata	Vertebrata	Euteleostomi	Mammalia	Eutheria	Laurasiatheria	Carnivora	Feliformia	Felidae	Felinae	Leopardus
>XP_003997185.2	Felis	catus		Eukaryota	Metazoa	Chordata	Craniata	Vertebrata	Euteleostomi	Mammalia	Eutheria	Laurasiatheria	Carnivora	Feliformia	Felidae	Felinae	Felis
>XP_039082155.1	Hyaena	hyaena		Eukaryota	Metazoa	Chordata	Craniata	Vertebrata	Euteleostomi	Mammalia	Eutheria	Laurasiatheria	Carnivora	Feliformia	Hyaenidae	Hyaena
>XP_032726558.1	Lontra	canadensis		Eukaryota	Metazoa	Chordata	Craniata	Vertebrata	Euteleostomi	Mammalia	Eutheria	Laurasiatheria	Carnivora	Caniformia	Mustelidae	Lutrinae	Lontra
>XP_026339980.1	Ursus	arctos		Eukaryota	Metazoa	Chordata	Craniata	Vertebrata	Euteleostomi	Mammalia	Eutheria	Laurasiatheria	Carnivora	Caniformia	Ursidae	Ursus
>XP_034497065.1	Ailuropoda	melanoleuca		Eukaryota	Metazoa	Chordata	Craniata	Vertebrata	Euteleostomi	Mammalia	Eutheria	Laurasiatheria	Carnivora	Caniformia	Ursidae	Ailuropoda
>XP_044601362.1	Equus	asinus		Eukaryota	Metazoa	Chordata	Craniata	Vertebrata	Euteleostomi	Mammalia	Eutheria	Laurasiatheria	Perissodactyla	Equidae	Equus
>XP_047613576.1	Phacochoerus	africanus		Eukaryota	Metazoa	Chordata	Craniata	Vertebrata	Euteleostomi	Mammalia	Eutheria	Laurasiatheria	Artiodactyla	Suina	Suidae	Phacochoerus
>XP_003131267.1	Sus	scrofa		Eukaryota	Metazoa	Chordata	Craniata	Vertebrata	Euteleostomi	Mammalia	Eutheria	Laurasiatheria	Artiodactyla	Suina	Suidae	Sus
>XP_006199428.1	Vicugna	pacos		Eukaryota	Metazoa	Chordata	Craniata	Vertebrata	Euteleostomi	Mammalia	Eutheria	Laurasiatheria	Artiodactyla	Tylopoda	Camelidae	Vicugna
>XP_045369559.1	Camelus	bactrianus		Eukaryota	Metazoa	Chordata	Craniata	Vertebrata	Euteleostomi	Mammalia	Eutheria	Laurasiatheria	Artiodactyla	Tylopoda	Camelidae	Camelus
>XP_022279658.2	Canis	lupus	familiaris	Eukaryota	Metazoa	Chordata	Craniata	Vertebrata	Euteleostomi	Mammalia	Eutheria	Laurasiatheria	Carnivora	Caniformia	Canidae	Canis
>XP_004860673.1	Heterocephalus	glaber		Eukaryota	Metazoa	Chordata	Craniata	Vertebrata	Euteleostomi	Mammalia	Eutheria	Euarchontoglires	Glires	Rodentia	Hystricomorpha	Bathyergidae	Heterocephalus
>XP_008591789.1	Galeopterus	variegatus		Eukaryota	Metazoa	Chordata	Craniata	Vertebrata	Euteleostomi	Mammalia	Eutheria	Euarchontoglires	Dermoptera	Cynocephalidae	Galeopterus
>XP_007454433.1	Lipotes	vexillifer		Eukaryota	Metazoa	Chordata	Craniata	Vertebrata	Euteleostomi	Mammalia	Eutheria	Laurasiatheria	Artiodactyla	Whippomorpha	Cetacea	Odontoceti	Lipotidae	Lipotes
>XP_024616779.1	Neophocaena	asiaeorientalis	asiaeorientalis	Eukaryota	Metazoa	Chordata	Craniata	Vertebrata	Euteleostomi	Mammalia	Eutheria	Laurasiatheria	Artiodactyla	Whippomorpha	Cetacea	Odontoceti	Phocoenidae	Neophocaena
>XP_022445385.1	Delphinapterus	leucas		Eukaryota	Metazoa	Chordata	Craniata	Vertebrata	Euteleostomi	Mammalia	Eutheria	Laurasiatheria	Artiodactyla	Whippomorpha	Cetacea	Odontoceti	Monodontidae	Delphinapterus
>XP_004275498.2	Orcinus	orca		Eukaryota	Metazoa	Chordata	Craniata	Vertebrata	Euteleostomi	Mammalia	Eutheria	Laurasiatheria	Artiodactyla	Whippomorpha	Cetacea	Odontoceti	Delphinidae	Orcinus
>XP_007099777.1	Physeter	catodon		Eukaryota	Metazoa	Chordata	Craniata	Vertebrata	Euteleostomi	Mammalia	Eutheria	Laurasiatheria	Artiodactyla	Whippomorpha	Cetacea	Odontoceti	Physeteridae	Physeter
>XP_007185697.1	Balaenoptera	acutorostrata	scammoni	Eukaryota	Metazoa	Chordata	Craniata	Vertebrata	Euteleostomi	Mammalia	Eutheria	Laurasiatheria	Artiodactyla	Whippomorpha	Cetacea	Mysticeti	Balaenopteridae	Balaenoptera
>XP_008153309.1	Eptesicus	fuscus		Eukaryota	Metazoa	Chordata	Craniata	Vertebrata	Euteleostomi	Mammalia	Eutheria	Laurasiatheria	Chiroptera	Microchiroptera	Vespertilionidae	Eptesicus
>XP_038184989.2	Arvicola	amphibius		Eukaryota	Metazoa	Chordata	Craniata	Vertebrata	Euteleostomi	Mammalia	Eutheria	Euarchontoglires	Glires	Rodentia	Myomorpha	Muroidea	Cricetidae	Arvicolinae	Arvicola
>XP_016075840.1	Miniopterus	natalensis		Eukaryota	Metazoa	Chordata	Craniata	Vertebrata	Euteleostomi	Mammalia	Eutheria	Laurasiatheria	Chiroptera	Microchiroptera	Vespertilionidae	Miniopterinae	Miniopterus
>XP_025715396.1	Callorhinus	ursinus		Eukaryota	Metazoa	Chordata	Craniata	Vertebrata	Euteleostomi	Mammalia	Eutheria	Laurasiatheria	Carnivora	Caniformia	Otariidae	Callorhinus
>XP_027968131.1	Eumetopias	jubatus		Eukaryota	Metazoa	Chordata	Craniata	Vertebrata	Euteleostomi	Mammalia	Eutheria	Laurasiatheria	Carnivora	Caniformia	Otariidae	Eumetopias
>XP_006728141.1	Leptonychotes	weddellii		Eukaryota	Metazoa	Chordata	Craniata	Vertebrata	Euteleostomi	Mammalia	Eutheria	Laurasiatheria	Carnivora	Caniformia	Phocidae	Leptonychotes
>XP_004374220.1	Trichechus	manatus	latirostris	Eukaryota	Metazoa	Chordata	Craniata	Vertebrata	Euteleostomi	Mammalia	Eutheria	Afrotheria	Sirenia	Trichechidae	Trichechus
>XP_006869657.1	Chrysochloris	asiatica		Eukaryota	Metazoa	Chordata	Craniata	Vertebrata	Euteleostomi	Mammalia	Eutheria	Afrotheria	Chrysochloridae	Chrysochlorinae	Chrysochloris
>XP_006886288.1	Elephantulus	edwardii		Eukaryota	Metazoa	Chordata	Craniata	Vertebrata	Euteleostomi	Mammalia	Eutheria	Afrotheria	Macroscelidea	Macroscelididae	Elephantulus
>XP_003417322.1	Loxodonta	africana		Eukaryota	Metazoa	Chordata	Craniata	Vertebrata	Euteleostomi	Mammalia	Eutheria	Afrotheria	Proboscidea	Elephantidae	Loxodonta
>XP_049716572.1	Elephas	maximus	indicus	Eukaryota	Metazoa	Chordata	Craniata	Vertebrata	Euteleostomi	Mammalia	Eutheria	Afrotheria	Proboscidea	Elephantidae	Elephas
>XP_004693537.1	Condylura	cristata		Eukaryota	Metazoa	Chordata	Craniata	Vertebrata	Euteleostomi	Mammalia	Eutheria	Laurasiatheria	Eulipotyphla	Talpidae	Condylura
>XP_037350202.1	Talpa	occidentalis		Eukaryota	Metazoa	Chordata	Craniata	Vertebrata	Euteleostomi	Mammalia	Eutheria	Laurasiatheria	Eulipotyphla	Talpidae	Talpa
>XP_008829669.1	Nannospalax	galili		Eukaryota	Metazoa	Chordata	Craniata	Vertebrata	Euteleostomi	Mammalia	Eutheria	Euarchontoglires	Glires	Rodentia	Myomorpha	Muroidea	Spalacidae	Spalacinae	Nannospalax
>XP_032947488.1	Rhinolophus	ferrumequinum		Eukaryota	Metazoa	Chordata	Craniata	Vertebrata	Euteleostomi	Mammalia	Eutheria	Laurasiatheria	Chiroptera	Microchiroptera	Rhinolophidae	Rhinolophinae	Rhinolophus
>XP_043316084.1	Cervus	canadensis		Eukaryota	Metazoa	Chordata	Craniata	Vertebrata	Euteleostomi	Mammalia	Eutheria	Laurasiatheria	Artiodactyla	Ruminantia	Pecora	Cervidae	Cervinae	Cervus
>XP_040100438.1	Oryx	dammah		Eukaryota	Metazoa	Chordata	Craniata	Vertebrata	Euteleostomi	Mammalia	Eutheria	Laurasiatheria	Artiodactyla	Ruminantia	Pecora	Bovidae	Hippotraginae	Oryx
>XP_020741510.1	Odocoileus	virginianus	texanus	Eukaryota	Metazoa	Chordata	Craniata	Vertebrata	Euteleostomi	Mammalia	Eutheria	Laurasiatheria	Artiodactyla	Ruminantia	Pecora	Cervidae	Odocoileinae	Odocoileus
>XP_010854437.1	Bison	bison	bison	Eukaryota	Metazoa	Chordata	Craniata	Vertebrata	Euteleostomi	Mammalia	Eutheria	Laurasiatheria	Artiodactyla	Ruminantia	Pecora	Bovidae	Bovinae	Bison
>XP_040845376.1	Ochotona	curzoniae		Eukaryota	Metazoa	Chordata	Craniata	Vertebrata	Euteleostomi	Mammalia	Eutheria	Euarchontoglires	Glires	Lagomorpha	Ochotonidae	Ochotona
>XP_051686515.1	Oryctolagus	cuniculus		Eukaryota	Metazoa	Chordata	Craniata	Vertebrata	Euteleostomi	Mammalia	Eutheria	Euarchontoglires	Glires	Lagomorpha	Leporidae	Oryctolagus
>XP_032032925.1	Hylobates	moloch		Eukaryota	Metazoa	Chordata	Craniata	Vertebrata	Euteleostomi	Mammalia	Eutheria	Euarchontoglires	Primates	Haplorrhini	Catarrhini	Hylobatidae	Hylobates
>XP_007524736.1	Erinaceus	europaeus		Eukaryota	Metazoa	Chordata	Craniata	Vertebrata	Euteleostomi	Mammalia	Eutheria	Laurasiatheria	Eulipotyphla	Erinaceidae	Erinaceinae	Erinaceus
>XP_012803587.2	Jaculus	jaculus		Eukaryota	Metazoa	Chordata	Craniata	Vertebrata	Euteleostomi	Mammalia	Eutheria	Euarchontoglires	Glires	Rodentia	Myomorpha	Dipodoidea	Dipodidae	Dipodinae	Jaculus
>XP_022379310.1	Enhydra	lutris	kenyoni	Eukaryota	Metazoa	Chordata	Craniata	Vertebrata	Euteleostomi	Mammalia	Eutheria	Laurasiatheria	Carnivora	Caniformia	Mustelidae	Lutrinae	Enhydra
>XP_036852986.1	Manis	javanica		Eukaryota	Metazoa	Chordata	Craniata	Vertebrata	Euteleostomi	Mammalia	Eutheria	Laurasiatheria	Pholidota	Manidae	Manis
>XP_004709211.1	Echinops	telfairi		Eukaryota	Metazoa	Chordata	Craniata	Vertebrata	Euteleostomi	Mammalia	Eutheria	Afrotheria	Tenrecidae	Tenrecinae	Echinops
>XP_037665499.1	Choloepus	didactylus		Eukaryota	Metazoa	Chordata	Craniata	Vertebrata	Euteleostomi	Mammalia	Eutheria	Xenarthra	Pilosa	Folivora	Megalonychidae	Choloepus
>XP_048222400.1	Perognathus	longimembris	pacificus	Eukaryota	Metazoa	Chordata	Craniata	Vertebrata	Euteleostomi	Mammalia	Eutheria	Euarchontoglires	Glires	Rodentia	Castorimorpha	Heteromyidae	Perognathinae	Perognathus
>XP_005332753.1	Ictidomys	tridecemlineatus		Eukaryota	Metazoa	Chordata	Craniata	Vertebrata	Euteleostomi	Mammalia	Eutheria	Euarchontoglires	Glires	Rodentia	Sciuromorpha	Sciuridae	Xerinae	Marmotini	Ictidomys
>XP_004463881.1	Dasypus	novemcinctus		Eukaryota	Metazoa	Chordata	Craniata	Vertebrata	Euteleostomi	Mammalia	Eutheria	Xenarthra	Cingulata	Dasypodidae	Dasypus
>XP_049625568.1	Suncus	etruscus		Eukaryota	Metazoa	Chordata	Craniata	Vertebrata	Euteleostomi	Mammalia	Eutheria	Laurasiatheria	Eulipotyphla	Soricidae	Crocidurinae	Suncus
>XP_004615727.1	Sorex	araneus		Eukaryota	Metazoa	Chordata	Craniata	Vertebrata	Euteleostomi	Mammalia	Eutheria	Laurasiatheria	Eulipotyphla	Soricidae	Soricinae	Sorex
>XP_010629053.1	Fukomys	damarensis		Eukaryota	Metazoa	Chordata	Craniata	Vertebrata	Euteleostomi	Mammalia	Eutheria	Euarchontoglires	Glires	Rodentia	Hystricomorpha	Bathyergidae	Fukomys
>XP_001369718.1	Monodelphis	domestica		Eukaryota	Metazoa	Chordata	Craniata	Vertebrata	Euteleostomi	Mammalia	Metatheria	Didelphimorphia	Didelphidae	Monodelphis
>XP_043818442.1	Dromiciops	gliroides		Eukaryota	Metazoa	Chordata	Craniata	Vertebrata	Euteleostomi	Mammalia	Metatheria	Microbiotheria	Microbiotheriidae	Dromiciops
>XP_036609189.1	Trichosurus	vulpecula		Eukaryota	Metazoa	Chordata	Craniata	Vertebrata	Euteleostomi	Mammalia	Metatheria	Diprotodontia	Phalangeridae	Trichosurus
>XP_051851108.1	Antechinus	flavipes		Eukaryota	Metazoa	Chordata	Craniata	Vertebrata	Euteleostomi	Mammalia	Metatheria	Dasyuromorphia	Dasyuridae	Antechinus
>XP_003768529.1	Sarcophilus	harrisii		Eukaryota	Metazoa	Chordata	Craniata	Vertebrata	Euteleostomi	Mammalia	Metatheria	Dasyuromorphia	Dasyuridae	Sarcophilus
>XP_044539934.1	Gracilinanus	agilis		Eukaryota	Metazoa	Chordata	Craniata	Vertebrata	Euteleostomi	Mammalia	Metatheria	Didelphimorphia	Didelphidae	Gracilinanus
>XP_020858350.1	Phascolarctos	cinereus		Eukaryota	Metazoa	Chordata	Craniata	Vertebrata	Euteleostomi	Mammalia	Metatheria	Diprotodontia	Phascolarctidae	Phascolarctos
>XP_028912747.1	Ornithorhynchus	anatinus		Eukaryota	Metazoa	Chordata	Craniata	Vertebrata	Euteleostomi	Mammalia	Monotremata	Ornithorhynchidae	Ornithorhynchus
>XP_038597873.1	Tachyglossus	aculeatus		Eukaryota	Metazoa	Chordata	Craniata	Vertebrata	Euteleostomi	Mammalia	Monotremata	Tachyglossidae	Tachyglossus
>XP_010307728.1	Balearica	regulorum	gibbericeps	Eukaryota	Metazoa	Chordata	Craniata	Vertebrata	Euteleostomi	Archelosauria	Archosauria	Dinosauria	Saurischia	Theropoda	Coelurosauria	Aves	Neognathae	Gruiformes	Gruidae	Balearica
>XP_005144305.2	Melopsittacus	undulatus		Eukaryota	Metazoa	Chordata	Craniata	Vertebrata	Euteleostomi	Archelosauria	Archosauria	Dinosauria	Saurischia	Theropoda	Coelurosauria	Aves	Neognathae	Psittaciformes	Psittaculidae	Melopsittacus
>XP_010012651.1	Nestor	notabilis		Eukaryota	Metazoa	Chordata	Craniata	Vertebrata	Euteleostomi	Archelosauria	Archosauria	Dinosauria	Saurischia	Theropoda	Coelurosauria	Aves	Neognathae	Psittaciformes	Psittacidae	Nestor
>XP_005243693.1	Falco	peregrinus		Eukaryota	Metazoa	Chordata	Craniata	Vertebrata	Euteleostomi	Archelosauria	Archosauria	Dinosauria	Saurischia	Theropoda	Coelurosauria	Aves	Neognathae	Falconiformes	Falconidae	Falco
>XP_009949537.1	Leptosomus	discolor		Eukaryota	Metazoa	Chordata	Craniata	Vertebrata	Euteleostomi	Archelosauria	Archosauria	Dinosauria	Saurischia	Theropoda	Coelurosauria	Aves	Neognathae	Coraciiformes	Leptosomidae	Leptosomus
>XP_009877892.1	Charadrius	vociferus		Eukaryota	Metazoa	Chordata	Craniata	Vertebrata	Euteleostomi	Archelosauria	Archosauria	Dinosauria	Saurischia	Theropoda	Coelurosauria	Aves	Neognathae	Charadriiformes	Charadriidae	Charadrius
>XP_005503145.1	Columba	livia		Eukaryota	Metazoa	Chordata	Craniata	Vertebrata	Euteleostomi	Archelosauria	Archosauria	Dinosauria	Saurischia	Theropoda	Coelurosauria	Aves	Neognathae	Columbiformes	Columbidae	Columba
>XP_010138436.1	Buceros	rhinoceros	silvestris	Eukaryota	Metazoa	Chordata	Craniata	Vertebrata	Euteleostomi	Archelosauria	Archosauria	Dinosauria	Saurischia	Theropoda	Coelurosauria	Aves	Neognathae	Bucerotiformes	Bucerotidae	Buceros
>XP_009693166.1	Cariama	cristata		Eukaryota	Metazoa	Chordata	Craniata	Vertebrata	Euteleostomi	Archelosauria	Archosauria	Dinosauria	Saurischia	Theropoda	Coelurosauria	Aves	Neognathae	Cariamiformes	Cariamidae	Cariama
>XP_009562245.1	Cuculus	canorus		Eukaryota	Metazoa	Chordata	Craniata	Vertebrata	Euteleostomi	Archelosauria	Archosauria	Dinosauria	Saurischia	Theropoda	Coelurosauria	Aves	Neognathae	Cuculiformes	Cuculidae	Cuculus
>XP_009472405.1	Nipponia	nippon		Eukaryota	Metazoa	Chordata	Craniata	Vertebrata	Euteleostomi	Archelosauria	Archosauria	Dinosauria	Saurischia	Theropoda	Coelurosauria	Aves	Neognathae	Pelecaniformes	Threskiornithidae	Nipponia
>XP_009277929.1	Aptenodytes	forsteri		Eukaryota	Metazoa	Chordata	Craniata	Vertebrata	Euteleostomi	Archelosauria	Archosauria	Dinosauria	Saurischia	Theropoda	Coelurosauria	Aves	Neognathae	Sphenisciformes	Spheniscidae	Aptenodytes
>XP_009866085.1	Apaloderma	vittatum		Eukaryota	Metazoa	Chordata	Craniata	Vertebrata	Euteleostomi	Archelosauria	Archosauria	Dinosauria	Saurischia	Theropoda	Coelurosauria	Aves	Neognathae	Trogoniformes	Trogonidae	Apaloderma
>XP_009984039.1	Tauraco	erythrolophus		Eukaryota	Metazoa	Chordata	Craniata	Vertebrata	Euteleostomi	Archelosauria	Archosauria	Dinosauria	Saurischia	Theropoda	Coelurosauria	Aves	Neognathae	Musophagiformes	Musophagidae	Tauraco
>XP_009636149.1	Egretta	garzetta		Eukaryota	Metazoa	Chordata	Craniata	Vertebrata	Euteleostomi	Archelosauria	Archosauria	Dinosauria	Saurischia	Theropoda	Coelurosauria	Aves	Neognathae	Pelecaniformes	Ardeidae	Egretta
>XP_009581599.1	Fulmarus	glacialis		Eukaryota	Metazoa	Chordata	Craniata	Vertebrata	Euteleostomi	Archelosauria	Archosauria	Dinosauria	Saurischia	Theropoda	Coelurosauria	Aves	Neognathae	Procellariiformes	Procellariidae	Fulmarus
>XP_010116084.1	Chlamydotis	macqueenii		Eukaryota	Metazoa	Chordata	Craniata	Vertebrata	Euteleostomi	Archelosauria	Archosauria	Dinosauria	Saurischia	Theropoda	Coelurosauria	Aves	Neognathae	Gruiformes	Otididae	Chlamydotis
>XP_014806541.1	Calidris	pugnax		Eukaryota	Metazoa	Chordata	Craniata	Vertebrata	Euteleostomi	Archelosauria	Archosauria	Dinosauria	Saurischia	Theropoda	Coelurosauria	Aves	Neognathae	Charadriiformes	Scolopacidae	Calidris
>XP_026716829.1	Athene	cunicularia		Eukaryota	Metazoa	Chordata	Craniata	Vertebrata	Euteleostomi	Archelosauria	Archosauria	Dinosauria	Saurischia	Theropoda	Coelurosauria	Aves	Neognathae	Strigiformes	Strigidae	Athene
>XP_010000966.1	Chaetura	pelagica		Eukaryota	Metazoa	Chordata	Craniata	Vertebrata	Euteleostomi	Archelosauria	Archosauria	Dinosauria	Saurischia	Theropoda	Coelurosauria	Aves	Neognathae	Caprimulgimorphae	Apodiformes	Apodidae	Apodinae	Chaetura
>XP_029868930.1	Aquila	chrysaetos	chrysaetos	Eukaryota	Metazoa	Chordata	Craniata	Vertebrata	Euteleostomi	Archelosauria	Archosauria	Dinosauria	Saurischia	Theropoda	Coelurosauria	Aves	Neognathae	Accipitriformes	Accipitridae	Accipitrinae	Aquila
>XP_049669327.1	Accipiter	gentilis		Eukaryota	Metazoa	Chordata	Craniata	Vertebrata	Euteleostomi	Archelosauria	Archosauria	Dinosauria	Saurischia	Theropoda	Coelurosauria	Aves	Neognathae	Accipitriformes	Accipitridae	Accipitrinae	Accipiter
>XP_009916746.1	Haliaeetus	albicilla		Eukaryota	Metazoa	Chordata	Craniata	Vertebrata	Euteleostomi	Archelosauria	Archosauria	Dinosauria	Saurischia	Theropoda	Coelurosauria	Aves	Neognathae	Accipitriformes	Accipitridae	Accipitrinae	Haliaeetus
>XP_013799570.1	Apteryx	mantelli	mantelli	Eukaryota	Metazoa	Chordata	Craniata	Vertebrata	Euteleostomi	Archelosauria	Archosauria	Dinosauria	Saurischia	Theropoda	Coelurosauria	Aves	Palaeognathae	Apterygiformes	Apterygidae	Apteryx	Apteryx	mantelli
>XP_025902607.1	Nothoprocta	perdicaria		Eukaryota	Metazoa	Chordata	Craniata	Vertebrata	Euteleostomi	Archelosauria	Archosauria	Dinosauria	Saurischia	Theropoda	Coelurosauria	Aves	Palaeognathae	Tinamiformes	Tinamidae	Nothoprocta
>XP_010210101.1	Tinamus	guttatus		Eukaryota	Metazoa	Chordata	Craniata	Vertebrata	Euteleostomi	Archelosauria	Archosauria	Dinosauria	Saurischia	Theropoda	Coelurosauria	Aves	Palaeognathae	Tinamiformes	Tinamidae	Tinamus
>XP_009677140.1	Struthio	camelus	australis	Eukaryota	Metazoa	Chordata	Craniata	Vertebrata	Euteleostomi	Archelosauria	Archosauria	Dinosauria	Saurischia	Theropoda	Coelurosauria	Aves	Palaeognathae	Struthioniformes	Struthionidae	Struthio
>XP_008492707.1	Calypte	anna		Eukaryota	Metazoa	Chordata	Craniata	Vertebrata	Euteleostomi	Archelosauria	Archosauria	Dinosauria	Saurischia	Theropoda	Coelurosauria	Aves	Neognathae	Caprimulgimorphae	Apodiformes	Trochilidae	Calypte
>XP_005012046.1	Anas	platyrhynchos		Eukaryota	Metazoa	Chordata	Craniata	Vertebrata	Euteleostomi	Archelosauria	Archosauria	Dinosauria	Saurischia	Theropoda	Coelurosauria	Aves	Neognathae	Galloanserae	Anseriformes	Anatidae	Anatinae	Anas
>XP_035414763.1	Cygnus	atratus		Eukaryota	Metazoa	Chordata	Craniata	Vertebrata	Euteleostomi	Archelosauria	Archosauria	Dinosauria	Saurischia	Theropoda	Coelurosauria	Aves	Neognathae	Galloanserae	Anseriformes	Anatidae	Anserinae	Cygnus
>XP_013034334.2	Anser	cygnoides		Eukaryota	Metazoa	Chordata	Craniata	Vertebrata	Euteleostomi	Archelosauria	Archosauria	Dinosauria	Saurischia	Theropoda	Coelurosauria	Aves	Neognathae	Galloanserae	Anseriformes	Anatidae	Anserinae	Anser
>XP_010075380.1	Pterocles	gutturalis		Eukaryota	Metazoa	Chordata	Craniata	Vertebrata	Euteleostomi	Archelosauria	Archosauria	Dinosauria	Saurischia	Theropoda	Coelurosauria	Aves	Neognathae	Ciconiiformes	Pteroclidae	Pterocles
>XP_009941210.1	Opisthocomus	hoazin		Eukaryota	Metazoa	Chordata	Craniata	Vertebrata	Euteleostomi	Archelosauria	Archosauria	Dinosauria	Saurischia	Theropoda	Coelurosauria	Aves	Neognathae	Opisthocomiformes	Opisthocomidae	Opisthocomus
>XP_021270840.1	Numida	meleagris		Eukaryota	Metazoa	Chordata	Craniata	Vertebrata	Euteleostomi	Archelosauria	Archosauria	Dinosauria	Saurischia	Theropoda	Coelurosauria	Aves	Neognathae	Galloanserae	Galliformes	Numididae	Numida
>XP_003211648.1	Meleagris	gallopavo		Eukaryota	Metazoa	Chordata	Craniata	Vertebrata	Euteleostomi	Archelosauria	Archosauria	Dinosauria	Saurischia	Theropoda	Coelurosauria	Aves	Neognathae	Galloanserae	Galliformes	Phasianidae	Meleagridinae	Meleagris
>XP_005424642.1	Geospiza	fortis		Eukaryota	Metazoa	Chordata	Craniata	Vertebrata	Euteleostomi	Archelosauria	Archosauria	Dinosauria	Saurischia	Theropoda	Coelurosauria	Aves	Neognathae	Passeriformes	Thraupidae	Geospiza
>XP_009973630.1	Tyto	alba		Eukaryota	Metazoa	Chordata	Craniata	Vertebrata	Euteleostomi	Archelosauria	Archosauria	Dinosauria	Saurischia	Theropoda	Coelurosauria	Aves	Neognathae	Strigiformes	Tytonidae	Tyto
>XP_009072877.1	Acanthisitta	chloris		Eukaryota	Metazoa	Chordata	Craniata	Vertebrata	Euteleostomi	Archelosauria	Archosauria	Dinosauria	Saurischia	Theropoda	Coelurosauria	Aves	Neognathae	Passeriformes	Acanthisittidae	Acanthisitta
>XP_008947805.1	Merops	nubicus		Eukaryota	Metazoa	Chordata	Craniata	Vertebrata	Euteleostomi	Archelosauria	Archosauria	Dinosauria	Saurischia	Theropoda	Coelurosauria	Aves	Neognathae	Coraciiformes	Meropidae	Merops
>XP_042688996.1	Centrocercus	urophasianus		Eukaryota	Metazoa	Chordata	Craniata	Vertebrata	Euteleostomi	Archelosauria	Archosauria	Dinosauria	Saurischia	Theropoda	Coelurosauria	Aves	Neognathae	Galloanserae	Galliformes	Phasianidae	Tetraoninae	Centrocercus
>XP_032640963.1	Chelonoidis	abingdonii		Eukaryota	Metazoa	Chordata	Craniata	Vertebrata	Euteleostomi	Archelosauria	Testudinata	Testudines	Cryptodira	Durocryptodira	Testudinoidea	Testudinidae	Chelonoidis
>XP_024070986.2	Terrapene	carolina	triunguis	Eukaryota	Metazoa	Chordata	Craniata	Vertebrata	Euteleostomi	Archelosauria	Testudinata	Testudines	Cryptodira	Durocryptodira	Testudinoidea	Emydidae	Terrapene
>XP_005297509.1	Chrysemys	picta	bellii	Eukaryota	Metazoa	Chordata	Craniata	Vertebrata	Euteleostomi	Archelosauria	Testudinata	Testudines	Cryptodira	Durocryptodira	Testudinoidea	Emydidae	Chrysemys
>XP_034646341.1	Trachemys	scripta	elegans	Eukaryota	Metazoa	Chordata	Craniata	Vertebrata	Euteleostomi	Archelosauria	Testudinata	Testudines	Cryptodira	Durocryptodira	Testudinoidea	Emydidae	Trachemys
>XP_048674797.1	Caretta	caretta		Eukaryota	Metazoa	Chordata	Craniata	Vertebrata	Euteleostomi	Archelosauria	Testudinata	Testudines	Cryptodira	Durocryptodira	Americhelydia	Chelonioidea	Cheloniidae	Caretta
>XP_007065094.2	Chelonia	mydas		Eukaryota	Metazoa	Chordata	Craniata	Vertebrata	Euteleostomi	Archelosauria	Testudinata	Testudines	Cryptodira	Durocryptodira	Americhelydia	Chelonioidea	Cheloniidae	Chelonia
>XP_038227682.1	Dermochelys	coriacea		Eukaryota	Metazoa	Chordata	Craniata	Vertebrata	Euteleostomi	Archelosauria	Testudinata	Testudines	Cryptodira	Durocryptodira	Americhelydia	Chelonioidea	Dermochelyidae	Dermochelys
>XP_030390823.1	Gopherus	evgoodei		Eukaryota	Metazoa	Chordata	Craniata	Vertebrata	Euteleostomi	Archelosauria	Testudinata	Testudines	Cryptodira	Durocryptodira	Testudinoidea	Testudinidae	Gopherus
>XP_006136467.1	Pelodiscus	sinensis		Eukaryota	Metazoa	Chordata	Craniata	Vertebrata	Euteleostomi	Archelosauria	Testudinata	Testudines	Cryptodira	Trionychia	Trionychidae	Pelodiscus
>XP_006262502.1	Alligator	mississippiensis		Eukaryota	Metazoa	Chordata	Craniata	Vertebrata	Euteleostomi	Archelosauria	Archosauria	Crocodylia	Alligatoridae	Alligatorinae	Alligator
>XP_019398062.1	Crocodylus	porosus		Eukaryota	Metazoa	Chordata	Craniata	Vertebrata	Euteleostomi	Archelosauria	Archosauria	Crocodylia	Longirostres	Crocodylidae	Crocodylus
>XP_019373466.1	Gavialis	gangeticus		Eukaryota	Metazoa	Chordata	Craniata	Vertebrata	Euteleostomi	Archelosauria	Archosauria	Crocodylia	Longirostres	Gavialidae	Gavialinae	Gavialis
>XP_020661967.1	Pogona	vitticeps		Eukaryota	Metazoa	Chordata	Craniata	Vertebrata	Euteleostomi	Lepidosauria	Squamata	Bifurcata	Unidentata	Episquamata	Toxicofera	Iguania	Acrodonta	Agamidae	Amphibolurinae	Pogona
>XP_003217267.1	Anolis	carolinensis		Eukaryota	Metazoa	Chordata	Craniata	Vertebrata	Euteleostomi	Lepidosauria	Squamata	Bifurcata	Unidentata	Episquamata	Toxicofera	Iguania	Dactyloidae	Anolis
>XP_042308785.1	Sceloporus	undulatus		Eukaryota	Metazoa	Chordata	Craniata	Vertebrata	Euteleostomi	Lepidosauria	Squamata	Bifurcata	Unidentata	Episquamata	Toxicofera	Iguania	Phrynosomatidae	Phrynosomatinae	Sceloporus
>XP_028572656.1	Podarcis	muralis		Eukaryota	Metazoa	Chordata	Craniata	Vertebrata	Euteleostomi	Lepidosauria	Squamata	Bifurcata	Unidentata	Episquamata	Laterata	Lacertibaenia	Lacertidae	Podarcis
>XP_032995154.1	Lacerta	agilis		Eukaryota	Metazoa	Chordata	Craniata	Vertebrata	Euteleostomi	Lepidosauria	Squamata	Bifurcata	Unidentata	Episquamata	Laterata	Lacertibaenia	Lacertidae	Lacerta
>XP_015266254.1	Gekko	japonicus		Eukaryota	Metazoa	Chordata	Craniata	Vertebrata	Euteleostomi	Lepidosauria	Squamata	Bifurcata	Gekkota	Gekkonidae	Gekkoninae	Gekko
>XP_048347641.1	Sphaerodactylus	townsendi		Eukaryota	Metazoa	Chordata	Craniata	Vertebrata	Euteleostomi	Lepidosauria	Squamata	Bifurcata	Gekkota	Sphaerodactylidae	Sphaerodactylus
>XP_015670546.1	Protobothrops	mucrosquamatus		Eukaryota	Metazoa	Chordata	Craniata	Vertebrata	Euteleostomi	Lepidosauria	Squamata	Bifurcata	Unidentata	Episquamata	Toxicofera	Serpentes	Colubroidea	Viperidae	Crotalinae	Protobothrops
>XP_039198826.1	Crotalus	tigris		Eukaryota	Metazoa	Chordata	Craniata	Vertebrata	Euteleostomi	Lepidosauria	Squamata	Bifurcata	Unidentata	Episquamata	Toxicofera	Serpentes	Colubroidea	Viperidae	Crotalinae	Crotalus
>XP_026557482.1	Pseudonaja	textilis		Eukaryota	Metazoa	Chordata	Craniata	Vertebrata	Euteleostomi	Lepidosauria	Squamata	Bifurcata	Unidentata	Episquamata	Toxicofera	Serpentes	Colubroidea	Elapidae	Acanthophiinae	Pseudonaja
>XP_034264592.1	Pantherophis	guttatus		Eukaryota	Metazoa	Chordata	Craniata	Vertebrata	Euteleostomi	Lepidosauria	Squamata	Bifurcata	Unidentata	Episquamata	Toxicofera	Serpentes	Colubroidea	Colubridae	Colubrinae	Pantherophis
>XP_013912869.1	Thamnophis	sirtalis		Eukaryota	Metazoa	Chordata	Craniata	Vertebrata	Euteleostomi	Lepidosauria	Squamata	Bifurcata	Unidentata	Episquamata	Toxicofera	Serpentes	Colubroidea	Colubridae	Natricinae	Thamnophis
>XP_026523012.1	Notechis	scutatus		Eukaryota	Metazoa	Chordata	Craniata	Vertebrata	Euteleostomi	Lepidosauria	Squamata	Bifurcata	Unidentata	Episquamata	Toxicofera	Serpentes	Colubroidea	Elapidae	Acanthophiinae	Notechis
>XP_007428087.1	Python	bivittatus		Eukaryota	Metazoa	Chordata	Craniata	Vertebrata	Euteleostomi	Lepidosauria	Squamata	Bifurcata	Unidentata	Episquamata	Toxicofera	Serpentes	Henophidia	Pythonidae	Python
>XP_030063061.1	Microcaecilia	unicolor		Eukaryota	Metazoa	Chordata	Craniata	Vertebrata	Euteleostomi	Amphibia	Gymnophiona	Siphonopidae	Microcaecilia
>XP_033815765.1	Geotrypetes	seraphini		Eukaryota	Metazoa	Chordata	Craniata	Vertebrata	Euteleostomi	Amphibia	Gymnophiona	Geotrypetes
>XP_029453455.1	Rhinatrema	bivittatum		Eukaryota	Metazoa	Chordata	Craniata	Vertebrata	Euteleostomi	Amphibia	Gymnophiona	Rhinatrematidae	Rhinatrema
>XP_005998319.1	Latimeria	chalumnae		Eukaryota	Metazoa	Chordata	Craniata	Vertebrata	Euteleostomi	Coelacanthiformes	Coelacanthidae	Latimeria
>XP_043943283.1	Protopterus	annectens		Eukaryota	Metazoa	Chordata	Craniata	Vertebrata	Euteleostomi	Dipnomorpha	Ceratodontiformes	Lepidosirenoidei	Protopteridae	Protopterus
>XP_051774927.1	Erpetoichthys	calabaricus		Eukaryota	Metazoa	Chordata	Craniata	Vertebrata	Euteleostomi	Actinopterygii	Polypteriformes	Polypteridae	Erpetoichthys
>XP_033895778.2	Acipenser	ruthenus		Eukaryota	Metazoa	Chordata	Craniata	Vertebrata	Euteleostomi	Actinopterygii	Chondrostei	Acipenseriformes	Acipenseridae	Acipenser
>XP_041077334.1	Polyodon	spathula		Eukaryota	Metazoa	Chordata	Craniata	Vertebrata	Euteleostomi	Actinopterygii	Chondrostei	Acipenseriformes	Polyodontidae	Polyodon
>XP_006635247.1	Lepisosteus	oculatus		Eukaryota	Metazoa	Chordata	Craniata	Vertebrata	Euteleostomi	Actinopterygii	Neopterygii	Holostei	Semionotiformes	Lepisosteidae	Lepisosteus
>XP_038634224.1	Scyliorhinus	canicula		Eukaryota	Metazoa	Chordata	Craniata	Vertebrata	Chondrichthyes	Elasmobranchii	Galeomorphii	Galeoidea	Carcharhiniformes	Scyliorhinidae	Scyliorhinus
>XP_004559496.1	Maylandia	zebra		Eukaryota	Metazoa	Chordata	Craniata	Vertebrata	Euteleostomi	Actinopterygii	Neopterygii	Teleostei	Neoteleostei	Acanthomorphata	Ovalentaria	Cichlomorphae	Cichliformes	Cichlidae	African	cichlids	Pseudocrenilabrinae	Haplochromini	Maylandia	Maylandia	zebra	complex
>XP_031601862.1	Oreochromis	aureus		Eukaryota	Metazoa	Chordata	Craniata	Vertebrata	Euteleostomi	Actinopterygii	Neopterygii	Teleostei	Neoteleostei	Acanthomorphata	Ovalentaria	Cichlomorphae	Cichliformes	Cichlidae	African	cichlids	Pseudocrenilabrinae	Oreochromini	Oreochromis
>XP_041813546.1	Chelmon	rostratus		Eukaryota	Metazoa	Chordata	Craniata	Vertebrata	Euteleostomi	Actinopterygii	Neopterygii	Teleostei	Neoteleostei	Acanthomorphata	Eupercaria	Chaetodontiformes	Chaetodontidae	Chelmon
>XP_051243893.1	Dicentrarchus	labrax		Eukaryota	Metazoa	Chordata	Craniata	Vertebrata	Euteleostomi	Actinopterygii	Neopterygii	Teleostei	Neoteleostei	Acanthomorphata	Eupercaria	Moronidae	Dicentrarchus
>XP_035510803.1	Morone	saxatilis		Eukaryota	Metazoa	Chordata	Craniata	Vertebrata	Euteleostomi	Actinopterygii	Neopterygii	Teleostei	Neoteleostei	Acanthomorphata	Eupercaria	Moronidae	Morone
>XP_022608242.1	Seriola	dumerili		Eukaryota	Metazoa	Chordata	Craniata	Vertebrata	Euteleostomi	Actinopterygii	Neopterygii	Teleostei	Neoteleostei	Acanthomorphata	Carangaria	Carangiformes	Carangidae	Seriola
>XP_018560175.2	Lates	calcarifer		Eukaryota	Metazoa	Chordata	Craniata	Vertebrata	Euteleostomi	Actinopterygii	Neopterygii	Teleostei	Neoteleostei	Acanthomorphata	Carangaria	Carangaria	incertae	sedis	Centropomidae	Lates
>XP_040918606.1	Toxotes	jaculatrix		Eukaryota	Metazoa	Chordata	Craniata	Vertebrata	Euteleostomi	Actinopterygii	Neopterygii	Teleostei	Neoteleostei	Acanthomorphata	Carangaria	Carangaria	incertae	sedis	Toxotidae	Toxotes
>XP_046270471.1	Scatophagus	argus		Eukaryota	Metazoa	Chordata	Craniata	Vertebrata	Euteleostomi	Actinopterygii	Neopterygii	Teleostei	Neoteleostei	Acanthomorphata	Eupercaria	Scatophagidae	Scatophagus
>XP_008301235.1	Stegastes	partitus		Eukaryota	Metazoa	Chordata	Craniata	Vertebrata	Euteleostomi	Actinopterygii	Neopterygii	Teleostei	Neoteleostei	Acanthomorphata	Ovalentaria	Pomacentridae	Stegastes
>XP_022066608.1	Acanthochromis	polyacanthus		Eukaryota	Metazoa	Chordata	Craniata	Vertebrata	Euteleostomi	Actinopterygii	Neopterygii	Teleostei	Neoteleostei	Acanthomorphata	Ovalentaria	Pomacentridae	Acanthochromis
>XP_042249412.1	Thunnus	maccoyii		Eukaryota	Metazoa	Chordata	Craniata	Vertebrata	Euteleostomi	Actinopterygii	Neopterygii	Teleostei	Neoteleostei	Acanthomorphata	Pelagiaria	Scombriformes	Scombridae	Thunnus
>XP_044037215.1	Siniperca	chuatsi		Eukaryota	Metazoa	Chordata	Craniata	Vertebrata	Euteleostomi	Actinopterygii	Neopterygii	Teleostei	Neoteleostei	Acanthomorphata	Eupercaria	Centrarchiformes	Centrarchoidei	Sinipercidae	Siniperca
>XP_045896891.1	Micropterus	dolomieu		Eukaryota	Metazoa	Chordata	Craniata	Vertebrata	Euteleostomi	Actinopterygii	Neopterygii	Teleostei	Neoteleostei	Acanthomorphata	Eupercaria	Centrarchiformes	Centrarchoidei	Centrarchidae	Micropterus
>XP_041852497.1	Melanotaenia	boesemani		Eukaryota	Metazoa	Chordata	Craniata	Vertebrata	Euteleostomi	Actinopterygii	Neopterygii	Teleostei	Neoteleostei	Acanthomorphata	Ovalentaria	Atherinomorphae	Atheriniformes	Melanotaeniidae	Melanotaenia
>XP_039978604.1	Xiphias	gladius		Eukaryota	Metazoa	Chordata	Craniata	Vertebrata	Euteleostomi	Actinopterygii	Neopterygii	Teleostei	Neoteleostei	Acanthomorphata	Carangaria	Istiophoriformes	Xiphiidae	Xiphias
>XP_035471487.1	Scophthalmus	maximus		Eukaryota	Metazoa	Chordata	Craniata	Vertebrata	Euteleostomi	Actinopterygii	Neopterygii	Teleostei	Neoteleostei	Acanthomorphata	Carangaria	Pleuronectiformes	Pleuronectoidei	Scophthalmidae	Scophthalmus
>XP_029364343.1	Echeneis	naucrates		Eukaryota	Metazoa	Chordata	Craniata	Vertebrata	Euteleostomi	Actinopterygii	Neopterygii	Teleostei	Neoteleostei	Acanthomorphata	Carangaria	Carangiformes	Echeneidae	Echeneis
>XP_034568049.1	Notolabrus	celidotus		Eukaryota	Metazoa	Chordata	Craniata	Vertebrata	Euteleostomi	Actinopterygii	Neopterygii	Teleostei	Neoteleostei	Acanthomorphata	Eupercaria	Labriformes	Labridae	Notolabrus
>XP_020791088.1	Boleophthalmus	pectinirostris		Eukaryota	Metazoa	Chordata	Craniata	Vertebrata	Euteleostomi	Actinopterygii	Neopterygii	Teleostei	Neoteleostei	Acanthomorphata	Gobiaria	Gobiiformes	Gobioidei	Gobiidae	Oxudercinae	Boleophthalmus
>XP_033827071.1	Periophthalmus	magnuspinnatus		Eukaryota	Metazoa	Chordata	Craniata	Vertebrata	Euteleostomi	Actinopterygii	Neopterygii	Teleostei	Neoteleostei	Acanthomorphata	Gobiaria	Gobiiformes	Gobioidei	Gobiidae	Oxudercinae	Periophthalmus
>XP_008327757.1	Cynoglossus	semilaevis		Eukaryota	Metazoa	Chordata	Craniata	Vertebrata	Euteleostomi	Actinopterygii	Neopterygii	Teleostei	Neoteleostei	Acanthomorphata	Carangaria	Pleuronectiformes	Pleuronectoidei	Cynoglossidae	Cynoglossinae	Cynoglossus
>XP_026181419.1	Mastacembelus	armatus		Eukaryota	Metazoa	Chordata	Craniata	Vertebrata	Euteleostomi	Actinopterygii	Neopterygii	Teleostei	Neoteleostei	Acanthomorphata	Anabantaria	Synbranchiformes	Mastacembelidae	Mastacembelus
>XP_026233123.1	Anabas	testudineus		Eukaryota	Metazoa	Chordata	Craniata	Vertebrata	Euteleostomi	Actinopterygii	Neopterygii	Teleostei	Neoteleostei	Acanthomorphata	Anabantaria	Anabantiformes	Anabantoidei	Anabantidae	Anabas
>XP_031723691.1	Anarrhichthys	ocellatus		Eukaryota	Metazoa	Chordata	Craniata	Vertebrata	Euteleostomi	Actinopterygii	Neopterygii	Teleostei	Neoteleostei	Acanthomorphata	Eupercaria	Perciformes	Cottioidei	Zoarcales	Anarhichadidae	Anarrhichthys
>XP_029293778.1	Cottoperca	gobio		Eukaryota	Metazoa	Chordata	Craniata	Vertebrata	Euteleostomi	Actinopterygii	Neopterygii	Teleostei	Neoteleostei	Acanthomorphata	Eupercaria	Perciformes	Notothenioidei	Bovichtidae	Cottoperca
>XP_029946425.1	Salarias	fasciatus		Eukaryota	Metazoa	Chordata	Craniata	Vertebrata	Euteleostomi	Actinopterygii	Neopterygii	Teleostei	Neoteleostei	Acanthomorphata	Ovalentaria	Blenniimorphae	Blenniiformes	Blennioidei	Blenniidae	Salariinae	Salarias
>XP_027897217.1	Xiphophorus	couchianus		Eukaryota	Metazoa	Chordata	Craniata	Vertebrata	Euteleostomi	Actinopterygii	Neopterygii	Teleostei	Neoteleostei	Acanthomorphata	Ovalentaria	Atherinomorphae	Cyprinodontiformes	Poeciliidae	Poeciliinae	Xiphophorus
>XP_007556380.1	Poecilia	formosa		Eukaryota	Metazoa	Chordata	Craniata	Vertebrata	Euteleostomi	Actinopterygii	Neopterygii	Teleostei	Neoteleostei	Acanthomorphata	Ovalentaria	Atherinomorphae	Cyprinodontiformes	Poeciliidae	Poeciliinae	Poecilia
>XP_038133346.1	Cyprinodon	tularosa		Eukaryota	Metazoa	Chordata	Craniata	Vertebrata	Euteleostomi	Actinopterygii	Neopterygii	Teleostei	Neoteleostei	Acanthomorphata	Ovalentaria	Atherinomorphae	Cyprinodontiformes	Cyprinodontidae	Cyprinodon
>XP_034448176.1	Hippoglossus	hippoglossus		Eukaryota	Metazoa	Chordata	Craniata	Vertebrata	Euteleostomi	Actinopterygii	Neopterygii	Teleostei	Neoteleostei	Acanthomorphata	Carangaria	Pleuronectiformes	Pleuronectoidei	Pleuronectidae	Hippoglossus
>XP_029997709.1	Sphaeramia	orbicularis		Eukaryota	Metazoa	Chordata	Craniata	Vertebrata	Euteleostomi	Actinopterygii	Neopterygii	Teleostei	Neoteleostei	Acanthomorphata	Gobiaria	Kurtiformes	Apogonoidei	Apogonidae	Apogoninae	Sphaeramia
>XP_020476632.1	Monopterus	albus		Eukaryota	Metazoa	Chordata	Craniata	Vertebrata	Euteleostomi	Actinopterygii	Neopterygii	Teleostei	Neoteleostei	Acanthomorphata	Anabantaria	Synbranchiformes	Synbranchidae	Monopterus
>XP_029913422.1	Myripristis	murdjan		Eukaryota	Metazoa	Chordata	Craniata	Vertebrata	Euteleostomi	Actinopterygii	Neopterygii	Teleostei	Neoteleostei	Acanthomorphata	Holocentriformes	Holocentridae	Myripristis
>XP_037544324.1	Nematolebias	whitei		Eukaryota	Metazoa	Chordata	Craniata	Vertebrata	Euteleostomi	Actinopterygii	Neopterygii	Teleostei	Neoteleostei	Acanthomorphata	Ovalentaria	Atherinomorphae	Cyprinodontiformes	Rivulidae	Nematolebias
>XP_029015973.1	Betta	splendens		Eukaryota	Metazoa	Chordata	Craniata	Vertebrata	Euteleostomi	Actinopterygii	Neopterygii	Teleostei	Neoteleostei	Acanthomorphata	Anabantaria	Anabantiformes	Anabantoidei	Osphronemidae	Betta
>XP_034047200.1	Thalassophryne	amazonica		Eukaryota	Metazoa	Chordata	Craniata	Vertebrata	Euteleostomi	Actinopterygii	Neopterygii	Teleostei	Neoteleostei	Acanthomorphata	Batrachoidaria	Batrachoididae	Thalassophryne
>XP_004071452.1	Oryzias	latipes		Eukaryota	Metazoa	Chordata	Craniata	Vertebrata	Euteleostomi	Actinopterygii	Neopterygii	Teleostei	Neoteleostei	Acanthomorphata	Ovalentaria	Atherinomorphae	Beloniformes	Adrianichthyidae	Oryziinae	Oryzias
>XP_047428134.1	Mugil	cephalus		Eukaryota	Metazoa	Chordata	Craniata	Vertebrata	Euteleostomi	Actinopterygii	Neopterygii	Teleostei	Neoteleostei	Acanthomorphata	Ovalentaria	Mugilomorphae	Mugilidae	Mugil
>XP_028310942.1	Gouania	willdenowi		Eukaryota	Metazoa	Chordata	Craniata	Vertebrata	Euteleostomi	Actinopterygii	Neopterygii	Teleostei	Neoteleostei	Acanthomorphata	Ovalentaria	Blenniimorphae	Blenniiformes	Gobiesocoidei	Gobiesocidae	Gobiesocinae	Gouania
>XP_026997153.1	Tachysurus	fulvidraco		Eukaryota	Metazoa	Chordata	Craniata	Vertebrata	Euteleostomi	Actinopterygii	Neopterygii	Teleostei	Ostariophysi	Siluriformes	Bagridae	Tachysurus
>XP_026771809.3	Pangasianodon	hypophthalmus		Eukaryota	Metazoa	Chordata	Craniata	Vertebrata	Euteleostomi	Actinopterygii	Neopterygii	Teleostei	Ostariophysi	Siluriformes	Pangasiidae	Pangasianodon
>XP_046722599.1	Silurus	meridionalis		Eukaryota	Metazoa	Chordata	Craniata	Vertebrata	Euteleostomi	Actinopterygii	Neopterygii	Teleostei	Ostariophysi	Siluriformes	Siluridae	Silurus
>XP_017340044.1	Ictalurus	punctatus		Eukaryota	Metazoa	Chordata	Craniata	Vertebrata	Euteleostomi	Actinopterygii	Neopterygii	Teleostei	Ostariophysi	Siluriformes	Ictaluridae	Ictalurus
>XP_017569536.1	Pygocentrus	nattereri		Eukaryota	Metazoa	Chordata	Craniata	Vertebrata	Euteleostomi	Actinopterygii	Neopterygii	Teleostei	Ostariophysi	Characiformes	Characoidei	Pygocentrus
>XP_036445742.1	Colossoma	macropomum		Eukaryota	Metazoa	Chordata	Craniata	Vertebrata	Euteleostomi	Actinopterygii	Neopterygii	Teleostei	Ostariophysi	Characiformes	Characoidei	Colossoma
>XP_022527145.1	Astyanax	mexicanus		Eukaryota	Metazoa	Chordata	Craniata	Vertebrata	Euteleostomi	Actinopterygii	Neopterygii	Teleostei	Ostariophysi	Characiformes	Characoidei	Characidae	Astyanax
>XP_030645826.1	Chanos	chanos		Eukaryota	Metazoa	Chordata	Craniata	Vertebrata	Euteleostomi	Actinopterygii	Neopterygii	Teleostei	Ostariophysi	Gonorynchiformes	Chanidae	Chanos
>XP_016355358.1	Sinocyclocheilus	anshuiensis		Eukaryota	Metazoa	Chordata	Craniata	Vertebrata	Euteleostomi	Actinopterygii	Neopterygii	Teleostei	Ostariophysi	Cypriniformes	Cyprinidae	Cyprininae	Sinocyclocheilus
>XP_026064718.1	Carassius	auratus		Eukaryota	Metazoa	Chordata	Craniata	Vertebrata	Euteleostomi	Actinopterygii	Neopterygii	Teleostei	Ostariophysi	Cypriniformes	Cyprinidae	Cyprininae	Carassius
>XP_048037886.1	Megalobrama	amblycephala		Eukaryota	Metazoa	Chordata	Craniata	Vertebrata	Euteleostomi	Actinopterygii	Neopterygii	Teleostei	Ostariophysi	Cypriniformes	Xenocyprididae	Xenocypridinae	Megalobrama
>XP_039511498.1	Pimephales	promelas		Eukaryota	Metazoa	Chordata	Craniata	Vertebrata	Euteleostomi	Actinopterygii	Neopterygii	Teleostei	Ostariophysi	Cypriniformes	Leuciscidae	Pogonichthyinae	Pimephales
>XP_002661315.1	Danio	rerio		Eukaryota	Metazoa	Chordata	Craniata	Vertebrata	Euteleostomi	Actinopterygii	Neopterygii	Teleostei	Ostariophysi	Cypriniformes	Danionidae	Danioninae	Danio
>XP_051570353.1	Myxocyprinus	asiaticus		Eukaryota	Metazoa	Chordata	Craniata	Vertebrata	Euteleostomi	Actinopterygii	Neopterygii	Teleostei	Ostariophysi	Cypriniformes	Catostomoidei	Catostomidae	Myxocyprinus
>XP_026856172.1	Electrophorus	electricus		Eukaryota	Metazoa	Chordata	Craniata	Vertebrata	Euteleostomi	Actinopterygii	Neopterygii	Teleostei	Ostariophysi	Gymnotiformes	Gymnotoidei	Gymnotidae	Electrophorus
>XP_028842768.1	Denticeps	clupeoides		Eukaryota	Metazoa	Chordata	Craniata	Vertebrata	Euteleostomi	Actinopterygii	Neopterygii	Teleostei	Clupei	Clupeiformes	Denticipitoidei	Denticipitidae	Denticeps
>XP_048100712.1	Alosa	alosa		Eukaryota	Metazoa	Chordata	Craniata	Vertebrata	Euteleostomi	Actinopterygii	Neopterygii	Teleostei	Clupei	Clupeiformes	Clupeoidei	Clupeidae	Alosa
>XP_012681919.2	Clupea	harengus		Eukaryota	Metazoa	Chordata	Craniata	Vertebrata	Euteleostomi	Actinopterygii	Neopterygii	Teleostei	Clupei	Clupeiformes	Clupeoidei	Clupeidae	Clupea
>XP_018588235.1	Scleropages	formosus		Eukaryota	Metazoa	Chordata	Craniata	Vertebrata	Euteleostomi	Actinopterygii	Neopterygii	Teleostei	Osteoglossocephala	Osteoglossomorpha	Osteoglossiformes	Osteoglossidae	Scleropages
>XP_023672276.1	Paramormyrops	kingsleyae		Eukaryota	Metazoa	Chordata	Craniata	Vertebrata	Euteleostomi	Actinopterygii	Neopterygii	Teleostei	Osteoglossocephala	Osteoglossomorpha	Osteoglossiformes	Mormyridae	Paramormyrops
>XP_048848072.1	Brienomyrus	brachyistius		Eukaryota	Metazoa	Chordata	Craniata	Vertebrata	Euteleostomi	Actinopterygii	Neopterygii	Teleostei	Osteoglossocephala	Osteoglossomorpha	Osteoglossiformes	Mormyridae	Brienomyrus
>XP_035253125.1	Anguilla	anguilla		Eukaryota	Metazoa	Chordata	Craniata	Vertebrata	Euteleostomi	Actinopterygii	Neopterygii	Teleostei	Anguilliformes	Anguillidae	Anguilla
>XP_037112710.1	Syngnathus	acus		Eukaryota	Metazoa	Chordata	Craniata	Vertebrata	Euteleostomi	Actinopterygii	Neopterygii	Teleostei	Neoteleostei	Acanthomorphata	Syngnathiaria	Syngnathiformes	Syngnathoidei	Syngnathidae	Syngnathus
>XP_045066964.1	Coregonus	clupeaformis		Eukaryota	Metazoa	Chordata	Craniata	Vertebrata	Euteleostomi	Actinopterygii	Neopterygii	Teleostei	Protacanthopterygii	Salmoniformes	Salmonidae	Coregoninae	Coregonus
>XP_046162025.1	Oncorhynchus	gorbuscha		Eukaryota	Metazoa	Chordata	Craniata	Vertebrata	Euteleostomi	Actinopterygii	Neopterygii	Teleostei	Protacanthopterygii	Salmoniformes	Salmonidae	Salmoninae	Oncorhynchus
>XP_010903928.2	Esox	lucius		Eukaryota	Metazoa	Chordata	Craniata	Vertebrata	Euteleostomi	Actinopterygii	Neopterygii	Teleostei	Protacanthopterygii	Esociformes	Esocidae	Esox
>XP_030229620.1	Gadus	morhua		Eukaryota	Metazoa	Chordata	Craniata	Vertebrata	Euteleostomi	Actinopterygii	Neopterygii	Teleostei	Neoteleostei	Acanthomorphata	Zeiogadaria	Gadariae	Gadiformes	Gadoidei	Gadidae	Gadus
>XP_036406881.1	Megalops	cyprinoides		Eukaryota	Metazoa	Chordata	Craniata	Vertebrata	Euteleostomi	Actinopterygii	Neopterygii	Teleostei	Elopiformes	Megalopidae	Megalops
>XP_015817694.1	Nothobranchius	furzeri		Eukaryota	Metazoa	Chordata	Craniata	Vertebrata	Euteleostomi	Actinopterygii	Neopterygii	Teleostei	Neoteleostei	Acanthomorphata	Ovalentaria	Atherinomorphae	Cyprinodontiformes	Nothobranchiidae	Nothobranchius
>XP_013870308.1	Austrofundulus	limnaeus		Eukaryota	Metazoa	Chordata	Craniata	Vertebrata	Euteleostomi	Actinopterygii	Neopterygii	Teleostei	Neoteleostei	Acanthomorphata	Ovalentaria	Atherinomorphae	Cyprinodontiformes	Rivulidae	Austrofundulus
>XP_028287345.1	Parambassis	ranga		Eukaryota	Metazoa	Chordata	Craniata	Vertebrata	Euteleostomi	Actinopterygii	Neopterygii	Teleostei	Neoteleostei	Acanthomorphata	Ovalentaria	Ambassidae	Parambassis
>XP_010740673.2	Larimichthys	crocea		Eukaryota	Metazoa	Chordata	Craniata	Vertebrata	Euteleostomi	Actinopterygii	Neopterygii	Teleostei	Neoteleostei	Acanthomorphata	Eupercaria	Sciaenidae	Larimichthys
>XP_030255235.1	Sparus	aurata		Eukaryota	Metazoa	Chordata	Craniata	Vertebrata	Euteleostomi	Actinopterygii	Neopterygii	Teleostei	Neoteleostei	Acanthomorphata	Eupercaria	Spariformes	Sparidae	Sparus
>XP_036937359.1	Acanthopagrus	latus		Eukaryota	Metazoa	Chordata	Craniata	Vertebrata	Euteleostomi	Actinopterygii	Neopterygii	Teleostei	Neoteleostei	Acanthomorphata	Eupercaria	Spariformes	Sparidae	Acanthopagrus
>XP_041671828.1	Cheilinus	undulatus		Eukaryota	Metazoa	Chordata	Craniata	Vertebrata	Euteleostomi	Actinopterygii	Neopterygii	Teleostei	Neoteleostei	Acanthomorphata	Eupercaria	Labriformes	Labridae	Cheilinus
>XP_020515057.1	Labrus	bergylta		Eukaryota	Metazoa	Chordata	Craniata	Vertebrata	Euteleostomi	Actinopterygii	Neopterygii	Teleostei	Neoteleostei	Acanthomorphata	Eupercaria	Labriformes	Labridae	Labrus
>XP_003961116.2	Takifugu	rubripes		Eukaryota	Metazoa	Chordata	Craniata	Vertebrata	Euteleostomi	Actinopterygii	Neopterygii	Teleostei	Neoteleostei	Acanthomorphata	Eupercaria	Tetraodontiformes	Tetradontoidea	Tetraodontidae	Takifugu
>XP_046887683.1	Hypomesus	transpacificus		Eukaryota	Metazoa	Chordata	Craniata	Vertebrata	Euteleostomi	Actinopterygii	Neopterygii	Teleostei	Stomiati	Osmeriformes	Osmeridae	Hypomesus
>XP_018424091.1	Nanorana	parkeri		Eukaryota	Metazoa	Chordata	Craniata	Vertebrata	Euteleostomi	Amphibia	Batrachia	Anura	Neobatrachia	Ranoidea	Dicroglossidae	Dicroglossinae	Nanorana
>XP_040291647.1	Bufo	bufo		Eukaryota	Metazoa	Chordata	Craniata	Vertebrata	Euteleostomi	Amphibia	Batrachia	Anura	Neobatrachia	Hyloidea	Bufonidae	Bufo
>XP_040187539.1	Rana	temporaria		Eukaryota	Metazoa	Chordata	Craniata	Vertebrata	Euteleostomi	Amphibia	Batrachia	Anura	Neobatrachia	Ranoidea	Ranidae	Rana	Rana
>XP_018090802.1	Xenopus	laevis		Eukaryota	Metazoa	Chordata	Craniata	Vertebrata	Euteleostomi	Amphibia	Batrachia	Anura	Pipoidea	Pipidae	Xenopodinae	Xenopus	Xenopus
>XP_007886944.1	Callorhinchus	milii		Eukaryota	Metazoa	Chordata	Craniata	Vertebrata	Chondrichthyes	Holocephali	Chimaeriformes	Callorhinchidae	Callorhinchus
>XP_032900374.1	Amblyraja	radiata		Eukaryota	Metazoa	Chordata	Craniata	Vertebrata	Chondrichthyes	Elasmobranchii	Batoidea	Rajiformes	Rajidae	Amblyraja
>XP_051888674.1	Pristis	pectinata		Eukaryota	Metazoa	Chordata	Craniata	Vertebrata	Chondrichthyes	Elasmobranchii	Batoidea	Rhinopristiformes	Pristidae	Pristis
>XP_032816882.1	Petromyzon	marinus		Eukaryota	Metazoa	Chordata	Craniata	Vertebrata	Cyclostomata	Hyperoartia	Petromyzontiformes	Petromyzontidae	Petromyzon
>XP_019499773.1	Hipposideros	armiger		Eukaryota	Metazoa	Chordata	Craniata	Vertebrata	Euteleostomi	Mammalia	Eutheria	Laurasiatheria	Chiroptera	Microchiroptera	Hipposideridae	Hipposideros
>XP_020391975.1	Rhincodon	typus		Eukaryota	Metazoa	Chordata	Craniata	Vertebrata	Chondrichthyes	Elasmobranchii	Galeomorphii	Galeoidea	Orectolobiformes	Rhincodontidae	Rhincodon
>XP_043567359.1	Chiloscyllium	plagiosum		Eukaryota	Metazoa	Chordata	Craniata	Vertebrata	Chondrichthyes	Elasmobranchii	Galeomorphii	Galeoidea	Orectolobiformes	Hemiscylliidae	Chiloscyllium
>XP_039630664.1	Polypterus	senegalus		Eukaryota	Metazoa	Chordata	Craniata	Vertebrata	Euteleostomi	Actinopterygii	Polypteriformes	Polypteridae	Polypterus
>XP_005584944.1	Macaca	fascicularis		Eukaryota	Metazoa	Chordata	Craniata	Vertebrata	Euteleostomi	Mammalia	Eutheria	Euarchontoglires	Primates	Haplorrhini	Catarrhini	Cercopithecidae	Cercopithecinae	Macaca
>XP_024409245.1	Desmodus	rotundus		Eukaryota	Metazoa	Chordata	Craniata	Vertebrata	Euteleostomi	Mammalia	Eutheria	Laurasiatheria	Chiroptera	Microchiroptera	Phyllostomidae	Desmodontinae	Desmodus
>NXG29166.1	Dromaius	novaehollandiae		Eukaryota	Metazoa	Chordata	Craniata	Vertebrata	Euteleostomi	Archelosauria	Archosauria	Dinosauria	Saurischia	Theropoda	Coelurosauria	Aves	Palaeognathae	Casuariiformes	Dromaiidae	Dromaius
>XP_009901177.1	Dryobates	pubescens		Eukaryota	Metazoa	Chordata	Craniata	Vertebrata	Euteleostomi	Archelosauria	Archosauria	Dinosauria	Saurischia	Theropoda	Coelurosauria	Aves	Neognathae	Piciformes	Picidae	Dryobates

## Sheet: mammalia
>XP_012893246.1	Dipodomys	ordii		Eukaryota	Metazoa	Chordata	Craniata	Vertebrata	Euteleostomi	Mammalia	Eutheria	Euarchontoglires	Glires	Rodentia	Castorimorpha	Heteromyidae	Dipodomyinae	Dipodomys
>XP_003495716.1	Cricetulus	griseus		Eukaryota	Metazoa	Chordata	Craniata	Vertebrata	Euteleostomi	Mammalia	Eutheria	Euarchontoglires	Glires	Rodentia	Myomorpha	Muroidea	Cricetidae	Cricetinae	Cricetulus
>XP_051013837.1	Acomys	russatus		Eukaryota	Metazoa	Chordata	Craniata	Vertebrata	Euteleostomi	Mammalia	Eutheria	Euarchontoglires	Glires	Rodentia	Myomorpha	Muroidea	Muridae	Deomyinae	Acomys
>XP_004630138.1	Octodon	degus		Eukaryota	Metazoa	Chordata	Craniata	Vertebrata	Euteleostomi	Mammalia	Eutheria	Euarchontoglires	Glires	Rodentia	Hystricomorpha	Octodontidae	Octodon
>XP_005412318.1	Chinchilla	lanigera		Eukaryota	Metazoa	Chordata	Craniata	Vertebrata	Euteleostomi	Mammalia	Eutheria	Euarchontoglires	Glires	Rodentia	Hystricomorpha	Chinchillidae	Chinchilla
>XP_008071527.1	Carlito	syrichta		Eukaryota	Metazoa	Chordata	Craniata	Vertebrata	Euteleostomi	Mammalia	Eutheria	Euarchontoglires	Primates	Haplorrhini	Tarsiiformes	Tarsiidae	Carlito
>XP_012658451.1	Otolemur	garnettii		Eukaryota	Metazoa	Chordata	Craniata	Vertebrata	Euteleostomi	Mammalia	Eutheria	Euarchontoglires	Primates	Strepsirrhini	Lorisiformes	Galagidae	Otolemur
>XP_015359786.1	Marmota	marmota	marmota	Eukaryota	Metazoa	Chordata	Craniata	Vertebrata	Euteleostomi	Mammalia	Eutheria	Euarchontoglires	Glires	Rodentia	Sciuromorpha	Sciuridae	Xerinae	Marmotini	Marmota
>XP_026260660.1	Urocitellus	parryii		Eukaryota	Metazoa	Chordata	Craniata	Vertebrata	Euteleostomi	Mammalia	Eutheria	Euarchontoglires	Glires	Rodentia	Sciuromorpha	Sciuridae	Xerinae	Marmotini	Urocitellus
>XP_012634205.1	Microcebus	murinus		Eukaryota	Metazoa	Chordata	Craniata	Vertebrata	Euteleostomi	Mammalia	Eutheria	Euarchontoglires	Primates	Strepsirrhini	Lemuriformes	Cheirogaleidae	Microcebus
>XP_012517715.1	Propithecus	coquereli		Eukaryota	Metazoa	Chordata	Craniata	Vertebrata	Euteleostomi	Mammalia	Eutheria	Euarchontoglires	Primates	Strepsirrhini	Lemuriformes	Indriidae	Propithecus
>XP_045425821.1	Lemur	catta		Eukaryota	Metazoa	Chordata	Craniata	Vertebrata	Euteleostomi	Mammalia	Eutheria	Euarchontoglires	Primates	Strepsirrhini	Lemuriformes	Lemuridae	Lemur
>XP_017391180.1	Cebus	imitator		Eukaryota	Metazoa	Chordata	Craniata	Vertebrata	Euteleostomi	Mammalia	Eutheria	Euarchontoglires	Primates	Haplorrhini	Platyrrhini	Cebidae	Cebinae	Cebus
>XP_003931803.1	Saimiri	boliviensis	boliviensis	Eukaryota	Metazoa	Chordata	Craniata	Vertebrata	Euteleostomi	Mammalia	Eutheria	Euarchontoglires	Primates	Haplorrhini	Platyrrhini	Cebidae	Saimiriinae	Saimiri
>XP_012309379.1	Aotus	nancymaae		Eukaryota	Metazoa	Chordata	Craniata	Vertebrata	Euteleostomi	Mammalia	Eutheria	Euarchontoglires	Primates	Haplorrhini	Platyrrhini	Aotidae	Aotus
>XP_008009999.1	Chlorocebus	sabaeus		Eukaryota	Metazoa	Chordata	Craniata	Vertebrata	Euteleostomi	Mammalia	Eutheria	Euarchontoglires	Primates	Haplorrhini	Catarrhini	Cercopithecidae	Cercopithecinae	Chlorocebus
>XP_011897961.1	Cercocebus	atys		Eukaryota	Metazoa	Chordata	Craniata	Vertebrata	Euteleostomi	Mammalia	Eutheria	Euarchontoglires	Primates	Haplorrhini	Catarrhini	Cercopithecidae	Cercopithecinae	Cercocebus
>XP_004040997.2	Gorilla	gorilla	gorilla	Eukaryota	Metazoa	Chordata	Craniata	Vertebrata	Euteleostomi	Mammalia	Eutheria	Euarchontoglires	Primates	Haplorrhini	Catarrhini	Hominidae	Gorilla
>NP_775748.2	Homo	sapiens		Eukaryota	Metazoa	Chordata	Craniata	Vertebrata	Euteleostomi	Mammalia	Eutheria	Euarchontoglires	Primates	Haplorrhini	Catarrhini	Hominidae	Homo
>XP_008964141.2	Pan	paniscus		Eukaryota	Metazoa	Chordata	Craniata	Vertebrata	Euteleostomi	Mammalia	Eutheria	Euarchontoglires	Primates	Haplorrhini	Catarrhini	Hominidae	Pan
>XP_024091013.1	Pongo	abelii		Eukaryota	Metazoa	Chordata	Craniata	Vertebrata	Euteleostomi	Mammalia	Eutheria	Euarchontoglires	Primates	Haplorrhini	Catarrhini	Hominidae	Pongo
>XP_003279093.2	Nomascus	leucogenys		Eukaryota	Metazoa	Chordata	Craniata	Vertebrata	Euteleostomi	Mammalia	Eutheria	Euarchontoglires	Primates	Haplorrhini	Catarrhini	Hylobatidae	Nomascus
>NP_789817.1	Mus	musculus		Eukaryota	Metazoa	Chordata	Craniata	Vertebrata	Euteleostomi	Mammalia	Eutheria	Euarchontoglires	Glires	Rodentia	Myomorpha	Muroidea	Muridae	Murinae	Mus
>XP_028608751.1	Grammomys	surdaster		Eukaryota	Metazoa	Chordata	Craniata	Vertebrata	Euteleostomi	Mammalia	Eutheria	Euarchontoglires	Glires	Rodentia	Myomorpha	Muroidea	Muridae	Murinae	Grammomys
>XP_052053459.1	Apodemus	sylvaticus		Eukaryota	Metazoa	Chordata	Craniata	Vertebrata	Euteleostomi	Mammalia	Eutheria	Euarchontoglires	Glires	Rodentia	Myomorpha	Muroidea	Muridae	Murinae	Apodemus	group
>XP_006145903.1	Tupaia	chinensis		Eukaryota	Metazoa	Chordata	Craniata	Vertebrata	Euteleostomi	Mammalia	Eutheria	Euarchontoglires	Scandentia	Tupaiidae	Tupaia
>XP_003464875.1	Cavia	porcellus		Eukaryota	Metazoa	Chordata	Craniata	Vertebrata	Euteleostomi	Mammalia	Eutheria	Euarchontoglires	Glires	Rodentia	Hystricomorpha	Caviidae	Cavia
>XP_036125118.1	Molossus	molossus		Eukaryota	Metazoa	Chordata	Craniata	Vertebrata	Euteleostomi	Mammalia	Eutheria	Laurasiatheria	Chiroptera	Microchiroptera	Molossidae	Molossus
>XP_006912304.1	Pteropus	alecto		Eukaryota	Metazoa	Chordata	Craniata	Vertebrata	Euteleostomi	Mammalia	Eutheria	Laurasiatheria	Chiroptera	Megachiroptera	Pteropodidae	Pteropodinae	Pteropus
>XP_015988001.2	Rousettus	aegyptiacus		Eukaryota	Metazoa	Chordata	Craniata	Vertebrata	Euteleostomi	Mammalia	Eutheria	Laurasiatheria	Chiroptera	Megachiroptera	Pteropodidae	Pteropodinae	Rousettus
>XP_004432789.1	Ceratotherium	simum	simum	Eukaryota	Metazoa	Chordata	Craniata	Vertebrata	Euteleostomi	Mammalia	Eutheria	Laurasiatheria	Perissodactyla	Rhinocerotidae	Ceratotherium
>XP_028376957.1	Phyllostomus	discolor		Eukaryota	Metazoa	Chordata	Craniata	Vertebrata	Euteleostomi	Mammalia	Eutheria	Laurasiatheria	Chiroptera	Microchiroptera	Phyllostomidae	Phyllostominae	Phyllostomus
>XP_029783928.1	Suricata	suricatta		Eukaryota	Metazoa	Chordata	Craniata	Vertebrata	Euteleostomi	Mammalia	Eutheria	Laurasiatheria	Carnivora	Feliformia	Herpestidae	Suricata
>XP_045346795.1	Leopardus	geoffroyi		Eukaryota	Metazoa	Chordata	Craniata	Vertebrata	Euteleostomi	Mammalia	Eutheria	Laurasiatheria	Carnivora	Feliformia	Felidae	Felinae	Leopardus
>XP_003997185.2	Felis	catus		Eukaryota	Metazoa	Chordata	Craniata	Vertebrata	Euteleostomi	Mammalia	Eutheria	Laurasiatheria	Carnivora	Feliformia	Felidae	Felinae	Felis
>XP_039082155.1	Hyaena	hyaena		Eukaryota	Metazoa	Chordata	Craniata	Vertebrata	Euteleostomi	Mammalia	Eutheria	Laurasiatheria	Carnivora	Feliformia	Hyaenidae	Hyaena
>XP_032726558.1	Lontra	canadensis		Eukaryota	Metazoa	Chordata	Craniata	Vertebrata	Euteleostomi	Mammalia	Eutheria	Laurasiatheria	Carnivora	Caniformia	Mustelidae	Lutrinae	Lontra
>XP_026339980.1	Ursus	arctos		Eukaryota	Metazoa	Chordata	Craniata	Vertebrata	Euteleostomi	Mammalia	Eutheria	Laurasiatheria	Carnivora	Caniformia	Ursidae	Ursus
>XP_034497065.1	Ailuropoda	melanoleuca		Eukaryota	Metazoa	Chordata	Craniata	Vertebrata	Euteleostomi	Mammalia	Eutheria	Laurasiatheria	Carnivora	Caniformia	Ursidae	Ailuropoda
>XP_044601362.1	Equus	asinus		Eukaryota	Metazoa	Chordata	Craniata	Vertebrata	Euteleostomi	Mammalia	Eutheria	Laurasiatheria	Perissodactyla	Equidae	Equus
>XP_047613576.1	Phacochoerus	africanus		Eukaryota	Metazoa	Chordata	Craniata	Vertebrata	Euteleostomi	Mammalia	Eutheria	Laurasiatheria	Artiodactyla	Suina	Suidae	Phacochoerus
>XP_003131267.1	Sus	scrofa		Eukaryota	Metazoa	Chordata	Craniata	Vertebrata	Euteleostomi	Mammalia	Eutheria	Laurasiatheria	Artiodactyla	Suina	Suidae	Sus
>XP_006199428.1	Vicugna	pacos		Eukaryota	Metazoa	Chordata	Craniata	Vertebrata	Euteleostomi	Mammalia	Eutheria	Laurasiatheria	Artiodactyla	Tylopoda	Camelidae	Vicugna
>XP_045369559.1	Camelus	bactrianus		Eukaryota	Metazoa	Chordata	Craniata	Vertebrata	Euteleostomi	Mammalia	Eutheria	Laurasiatheria	Artiodactyla	Tylopoda	Camelidae	Camelus
>XP_022279658.2	Canis	lupus	familiaris	Eukaryota	Metazoa	Chordata	Craniata	Vertebrata	Euteleostomi	Mammalia	Eutheria	Laurasiatheria	Carnivora	Caniformia	Canidae	Canis
>XP_004860673.1	Heterocephalus	glaber		Eukaryota	Metazoa	Chordata	Craniata	Vertebrata	Euteleostomi	Mammalia	Eutheria	Euarchontoglires	Glires	Rodentia	Hystricomorpha	Bathyergidae	Heterocephalus
>XP_008591789.1	Galeopterus	variegatus		Eukaryota	Metazoa	Chordata	Craniata	Vertebrata	Euteleostomi	Mammalia	Eutheria	Euarchontoglires	Dermoptera	Cynocephalidae	Galeopterus
>XP_007454433.1	Lipotes	vexillifer		Eukaryota	Metazoa	Chordata	Craniata	Vertebrata	Euteleostomi	Mammalia	Eutheria	Laurasiatheria	Artiodactyla	Whippomorpha	Cetacea	Odontoceti	Lipotidae	Lipotes
>XP_024616779.1	Neophocaena	asiaeorientalis	asiaeorientalis	Eukaryota	Metazoa	Chordata	Craniata	Vertebrata	Euteleostomi	Mammalia	Eutheria	Laurasiatheria	Artiodactyla	Whippomorpha	Cetacea	Odontoceti	Phocoenidae	Neophocaena
>XP_022445385.1	Delphinapterus	leucas		Eukaryota	Metazoa	Chordata	Craniata	Vertebrata	Euteleostomi	Mammalia	Eutheria	Laurasiatheria	Artiodactyla	Whippomorpha	Cetacea	Odontoceti	Monodontidae	Delphinapterus
>XP_004275498.2	Orcinus	orca		Eukaryota	Metazoa	Chordata	Craniata	Vertebrata	Euteleostomi	Mammalia	Eutheria	Laurasiatheria	Artiodactyla	Whippomorpha	Cetacea	Odontoceti	Delphinidae	Orcinus
>XP_007099777.1	Physeter	catodon		Eukaryota	Metazoa	Chordata	Craniata	Vertebrata	Euteleostomi	Mammalia	Eutheria	Laurasiatheria	Artiodactyla	Whippomorpha	Cetacea	Odontoceti	Physeteridae	Physeter
>XP_007185697.1	Balaenoptera	acutorostrata	scammoni	Eukaryota	Metazoa	Chordata	Craniata	Vertebrata	Euteleostomi	Mammalia	Eutheria	Laurasiatheria	Artiodactyla	Whippomorpha	Cetacea	Mysticeti	Balaenopteridae	Balaenoptera
>XP_008153309.1	Eptesicus	fuscus		Eukaryota	Metazoa	Chordata	Craniata	Vertebrata	Euteleostomi	Mammalia	Eutheria	Laurasiatheria	Chiroptera	Microchiroptera	Vespertilionidae	Eptesicus
>XP_038184989.2	Arvicola	amphibius		Eukaryota	Metazoa	Chordata	Craniata	Vertebrata	Euteleostomi	Mammalia	Eutheria	Euarchontoglires	Glires	Rodentia	Myomorpha	Muroidea	Cricetidae	Arvicolinae	Arvicola
>XP_016075840.1	Miniopterus	natalensis		Eukaryota	Metazoa	Chordata	Craniata	Vertebrata	Euteleostomi	Mammalia	Eutheria	Laurasiatheria	Chiroptera	Microchiroptera	Vespertilionidae	Miniopterinae	Miniopterus
>XP_025715396.1	Callorhinus	ursinus		Eukaryota	Metazoa	Chordata	Craniata	Vertebrata	Euteleostomi	Mammalia	Eutheria	Laurasiatheria	Carnivora	Caniformia	Otariidae	Callorhinus
>XP_027968131.1	Eumetopias	jubatus		Eukaryota	Metazoa	Chordata	Craniata	Vertebrata	Euteleostomi	Mammalia	Eutheria	Laurasiatheria	Carnivora	Caniformia	Otariidae	Eumetopias
>XP_006728141.1	Leptonychotes	weddellii		Eukaryota	Metazoa	Chordata	Craniata	Vertebrata	Euteleostomi	Mammalia	Eutheria	Laurasiatheria	Carnivora	Caniformia	Phocidae	Leptonychotes
>XP_004374220.1	Trichechus	manatus	latirostris	Eukaryota	Metazoa	Chordata	Craniata	Vertebrata	Euteleostomi	Mammalia	Eutheria	Afrotheria	Sirenia	Trichechidae	Trichechus
>XP_006869657.1	Chrysochloris	asiatica		Eukaryota	Metazoa	Chordata	Craniata	Vertebrata	Euteleostomi	Mammalia	Eutheria	Afrotheria	Chrysochloridae	Chrysochlorinae	Chrysochloris
>XP_006886288.1	Elephantulus	edwardii		Eukaryota	Metazoa	Chordata	Craniata	Vertebrata	Euteleostomi	Mammalia	Eutheria	Afrotheria	Macroscelidea	Macroscelididae	Elephantulus
>XP_003417322.1	Loxodonta	africana		Eukaryota	Metazoa	Chordata	Craniata	Vertebrata	Euteleostomi	Mammalia	Eutheria	Afrotheria	Proboscidea	Elephantidae	Loxodonta
>XP_049716572.1	Elephas	maximus	indicus	Eukaryota	Metazoa	Chordata	Craniata	Vertebrata	Euteleostomi	Mammalia	Eutheria	Afrotheria	Proboscidea	Elephantidae	Elephas
>XP_004693537.1	Condylura	cristata		Eukaryota	Metazoa	Chordata	Craniata	Vertebrata	Euteleostomi	Mammalia	Eutheria	Laurasiatheria	Eulipotyphla	Talpidae	Condylura
>XP_037350202.1	Talpa	occidentalis		Eukaryota	Metazoa	Chordata	Craniata	Vertebrata	Euteleostomi	Mammalia	Eutheria	Laurasiatheria	Eulipotyphla	Talpidae	Talpa
>XP_008829669.1	Nannospalax	galili		Eukaryota	Metazoa	Chordata	Craniata	Vertebrata	Euteleostomi	Mammalia	Eutheria	Euarchontoglires	Glires	Rodentia	Myomorpha	Muroidea	Spalacidae	Spalacinae	Nannospalax
>XP_032947488.1	Rhinolophus	ferrumequinum		Eukaryota	Metazoa	Chordata	Craniata	Vertebrata	Euteleostomi	Mammalia	Eutheria	Laurasiatheria	Chiroptera	Microchiroptera	Rhinolophidae	Rhinolophinae	Rhinolophus
>XP_043316084.1	Cervus	canadensis		Eukaryota	Metazoa	Chordata	Craniata	Vertebrata	Euteleostomi	Mammalia	Eutheria	Laurasiatheria	Artiodactyla	Ruminantia	Pecora	Cervidae	Cervinae	Cervus
>XP_040100438.1	Oryx	dammah		Eukaryota	Metazoa	Chordata	Craniata	Vertebrata	Euteleostomi	Mammalia	Eutheria	Laurasiatheria	Artiodactyla	Ruminantia	Pecora	Bovidae	Hippotraginae	Oryx
>XP_020741510.1	Odocoileus	virginianus	texanus	Eukaryota	Metazoa	Chordata	Craniata	Vertebrata	Euteleostomi	Mammalia	Eutheria	Laurasiatheria	Artiodactyla	Ruminantia	Pecora	Cervidae	Odocoileinae	Odocoileus
>XP_010854437.1	Bison	bison	bison	Eukaryota	Metazoa	Chordata	Craniata	Vertebrata	Euteleostomi	Mammalia	Eutheria	Laurasiatheria	Artiodactyla	Ruminantia	Pecora	Bovidae	Bovinae	Bison
>XP_040845376.1	Ochotona	curzoniae		Eukaryota	Metazoa	Chordata	Craniata	Vertebrata	Euteleostomi	Mammalia	Eutheria	Euarchontoglires	Glires	Lagomorpha	Ochotonidae	Ochotona
>XP_051686515.1	Oryctolagus	cuniculus		Eukaryota	Metazoa	Chordata	Craniata	Vertebrata	Euteleostomi	Mammalia	Eutheria	Euarchontoglires	Glires	Lagomorpha	Leporidae	Oryctolagus
>XP_032032925.1	Hylobates	moloch		Eukaryota	Metazoa	Chordata	Craniata	Vertebrata	Euteleostomi	Mammalia	Eutheria	Euarchontoglires	Primates	Haplorrhini	Catarrhini	Hylobatidae	Hylobates
>XP_007524736.1	Erinaceus	europaeus		Eukaryota	Metazoa	Chordata	Craniata	Vertebrata	Euteleostomi	Mammalia	Eutheria	Laurasiatheria	Eulipotyphla	Erinaceidae	Erinaceinae	Erinaceus
>XP_012803587.2	Jaculus	jaculus		Eukaryota	Metazoa	Chordata	Craniata	Vertebrata	Euteleostomi	Mammalia	Eutheria	Euarchontoglires	Glires	Rodentia	Myomorpha	Dipodoidea	Dipodidae	Dipodinae	Jaculus
>XP_022379310.1	Enhydra	lutris	kenyoni	Eukaryota	Metazoa	Chordata	Craniata	Vertebrata	Euteleostomi	Mammalia	Eutheria	Laurasiatheria	Carnivora	Caniformia	Mustelidae	Lutrinae	Enhydra
>XP_036852986.1	Manis	javanica		Eukaryota	Metazoa	Chordata	Craniata	Vertebrata	Euteleostomi	Mammalia	Eutheria	Laurasiatheria	Pholidota	Manidae	Manis
>XP_004709211.1	Echinops	telfairi		Eukaryota	Metazoa	Chordata	Craniata	Vertebrata	Euteleostomi	Mammalia	Eutheria	Afrotheria	Tenrecidae	Tenrecinae	Echinops
>XP_037665499.1	Choloepus	didactylus		Eukaryota	Metazoa	Chordata	Craniata	Vertebrata	Euteleostomi	Mammalia	Eutheria	Xenarthra	Pilosa	Folivora	Megalonychidae	Choloepus
>XP_048222400.1	Perognathus	longimembris	pacificus	Eukaryota	Metazoa	Chordata	Craniata	Vertebrata	Euteleostomi	Mammalia	Eutheria	Euarchontoglires	Glires	Rodentia	Castorimorpha	Heteromyidae	Perognathinae	Perognathus
>XP_005332753.1	Ictidomys	tridecemlineatus		Eukaryota	Metazoa	Chordata	Craniata	Vertebrata	Euteleostomi	Mammalia	Eutheria	Euarchontoglires	Glires	Rodentia	Sciuromorpha	Sciuridae	Xerinae	Marmotini	Ictidomys
>XP_004463881.1	Dasypus	novemcinctus		Eukaryota	Metazoa	Chordata	Craniata	Vertebrata	Euteleostomi	Mammalia	Eutheria	Xenarthra	Cingulata	Dasypodidae	Dasypus
>XP_049625568.1	Suncus	etruscus		Eukaryota	Metazoa	Chordata	Craniata	Vertebrata	Euteleostomi	Mammalia	Eutheria	Laurasiatheria	Eulipotyphla	Soricidae	Crocidurinae	Suncus
>XP_004615727.1	Sorex	araneus		Eukaryota	Metazoa	Chordata	Craniata	Vertebrata	Euteleostomi	Mammalia	Eutheria	Laurasiatheria	Eulipotyphla	Soricidae	Soricinae	Sorex
>XP_010629053.1	Fukomys	damarensis		Eukaryota	Metazoa	Chordata	Craniata	Vertebrata	Euteleostomi	Mammalia	Eutheria	Euarchontoglires	Glires	Rodentia	Hystricomorpha	Bathyergidae	Fukomys
>XP_001369718.1	Monodelphis	domestica		Eukaryota	Metazoa	Chordata	Craniata	Vertebrata	Euteleostomi	Mammalia	Metatheria	Didelphimorphia	Didelphidae	Monodelphis
>XP_043818442.1	Dromiciops	gliroides		Eukaryota	Metazoa	Chordata	Craniata	Vertebrata	Euteleostomi	Mammalia	Metatheria	Microbiotheria	Microbiotheriidae	Dromiciops
>XP_036609189.1	Trichosurus	vulpecula		Eukaryota	Metazoa	Chordata	Craniata	Vertebrata	Euteleostomi	Mammalia	Metatheria	Diprotodontia	Phalangeridae	Trichosurus
>XP_051851108.1	Antechinus	flavipes		Eukaryota	Metazoa	Chordata	Craniata	Vertebrata	Euteleostomi	Mammalia	Metatheria	Dasyuromorphia	Dasyuridae	Antechinus
>XP_003768529.1	Sarcophilus	harrisii		Eukaryota	Metazoa	Chordata	Craniata	Vertebrata	Euteleostomi	Mammalia	Metatheria	Dasyuromorphia	Dasyuridae	Sarcophilus
>XP_044539934.1	Gracilinanus	agilis		Eukaryota	Metazoa	Chordata	Craniata	Vertebrata	Euteleostomi	Mammalia	Metatheria	Didelphimorphia	Didelphidae	Gracilinanus
>XP_020858350.1	Phascolarctos	cinereus		Eukaryota	Metazoa	Chordata	Craniata	Vertebrata	Euteleostomi	Mammalia	Metatheria	Diprotodontia	Phascolarctidae	Phascolarctos
>XP_028912747.1	Ornithorhynchus	anatinus		Eukaryota	Metazoa	Chordata	Craniata	Vertebrata	Euteleostomi	Mammalia	Monotremata	Ornithorhynchidae	Ornithorhynchus
>XP_038597873.1	Tachyglossus	aculeatus		Eukaryota	Metazoa	Chordata	Craniata	Vertebrata	Euteleostomi	Mammalia	Monotremata	Tachyglossidae	Tachyglossus
>XP_005584944.1	Macaca	fascicularis		Eukaryota	Metazoa	Chordata	Craniata	Vertebrata	Euteleostomi	Mammalia	Eutheria	Euarchontoglires	Primates	Haplorrhini	Catarrhini	Cercopithecidae	Cercopithecinae	Macaca
>XP_024409245.1	Desmodus	rotundus		Eukaryota	Metazoa	Chordata	Craniata	Vertebrata	Euteleostomi	Mammalia	Eutheria	Laurasiatheria	Chiroptera	Microchiroptera	Phyllostomidae	Desmodontinae	Desmodus
